# Supplementary material for: Axially chiral thiophene scaffolds: configurational stability and circularly polarized luminescence
Source: Royal Society of Chemistry journal article supplement (doi:10.1039/d5sc07682j), 2026-01-01
Supplement: d5sc07682j1.pdf [file d5sc07682j1.pdf]

## Supporting Information

### Axially Chiral Thiophene Scaffolds: Configurational Stability and Circularly Polarized Luminescence

*Xinyang Li, Shuai Qiu, Wan Xu\*, Jia Tang, Zhiying Ma and Hua Wang\**

### Table of Contents

|                                                                             |     |
|-----------------------------------------------------------------------------|-----|
| 1. Experimental section.....                                                | S2  |
| General procedures and materials. ....                                      | S2  |
| Synthesis of <b>BDTT-Me</b> .....                                           | S3  |
| Synthesis of <b>BDTT-Ph</b> . ....                                          | S4  |
| Synthesis of <b>BDTT-1Np</b> . ....                                         | S4  |
| Synthesis of <b>BDTT-2Np</b> . ....                                         | S5  |
| Synthesis of <b>BDTT-2An</b> .....                                          | S6  |
| Synthesis of <b>BDTT-9An</b> . ....                                         | S6  |
| Synthesis of <b>BDTT-1Py</b> .....                                          | S7  |
| 2. NMR and HRMS spectra .....                                               | S8  |
| NMR and HRMS spectra of <b>BDTT-Me</b> . ....                               | S8  |
| NMR and HRMS spectra of <b>BDTT-Ph</b> . ....                               | S9  |
| NMR and HRMS spectra of <b>BDTT-1Np</b> .....                               | S11 |
| NMR and HRMS spectra of <b>BDTT-2Np</b> .....                               | S12 |
| NMR and HRMS spectra of <b>BDTT-2An</b> .....                               | S14 |
| NMR and HRMS spectra of <b>BDTT-9An</b> .....                               | S15 |
| NMR and HRMS spectra of <b>BDTT-1Py</b> . ....                              | S17 |
| 3. Resolution, optical rotations, and racemization of <b>BDTT-Ars</b> ..... | S18 |
| 4. Optical and electrochemical data of <b>BDTT-Ars</b> .....                | S33 |

|                                                                                      |     |
|--------------------------------------------------------------------------------------|-----|
| UV-Vis and emission spectra of <b>BDTT</b> , <b>BDTT-Br</b> and <b>BDTT-Me</b> ..... | S33 |
| Optical and electrochemical data of <b>BDTT-Ars</b> .....                            | S33 |
| Cyclic voltammetries of <b>BDTT-Ars</b> .....                                        | S34 |
| 5. References.....                                                                   | S35 |

## 1. Experimental details

### General Procedures and Materials

Ether and tetrahydrofuran (THF) for use on vacuum line were freshly distilled from sodium/benzophenone prior to use. The concentration of *n*-BuLi (in hexane) were determined by titration with *N*-pivaloyl-*o*-toluidine.<sup>S1</sup> Column chromatography was carried out on silica gel (300-400 mesh). Analytical thin-layer chromatography was performed on glass plates of silica gel GF-254 with detection by UV. Standard techniques for synthesis under inert atmosphere, using gasbag and Schlenk glassware equipped with an 8 mm PTFE vacuum stopcock, were employed. All starting materials and reagents were commercially available.

<sup>1</sup>H NMR and <sup>13</sup>C NMR spectra were recorded on 400 or 500 MHz NMR instruments using CDCl<sub>3</sub> (7.26 and 77.00 ppm) as solvent. IR spectra were obtained using an FT-IR instrument. HRMS analysis was carried out on mass spectrometers equipped with MALDI and DART Positive Ion Mode. Melting point determination was taken on a Melt-Temp apparatus and was uncorrected. UV-vis spectra were obtained with a double-beam spectrophotometer at room temperature. The phosphorescence spectra as well as lifetime measurements were recorded on a spectrofluorometer (Edinburgh FLS980). CD spectra were recorded on Aviv Biomedical Inc Model 420SF. Circularly polarized luminescence (CPL) properties were measured with a CPL-300 spectrophotometer (JASCO). Cyclic voltammetry (CV) measurements were performed on a CHI600E electrochemical workstation (Shanghai Chenhua Instrument Co., China). All experiments were carried out with a three electrode system in a electrolytic tank under Ar at room temperature (25±1°C). Platinum electrode (a glassy carbon coated electrode with the size of 6 mm<sup>2</sup> × 8 cm), Pt wire (1 mm<sup>2</sup> × 7 cm) and Ag/AgCl electrode (by immersion into HCl/HNO<sub>3</sub> (3/1)) were used as the working electrode, counter electrode and reference electrode, respectively. Polishing material: Shanghai Yue ci α-alumina polishing powder (1 μm), Shanghai Chenhua polished flannel. Prior to measurements, the solvents were dried as described above and additionally degassed by five freeze-pump-thaw cycles. [*n*Bu<sub>4</sub>N][PF<sub>6</sub>] was employed as the supporting electrolyte (0.1 M). All potential values were

referenced against the FcH/FcH<sup>+</sup> oxidation couple (FcH = ferrocene). Scan rates 100 mV s<sup>-1</sup>. All cyclic voltammograms were plotted according to the polarographic convention. Further details were in the deposited CIF files. The fluorescence quantum yields ( $\Phi_F$ ) of **BDTT-Ars** were characterized in dichloromethane with quinine sulfate ( $\Phi_F = 0.55$ ,  $1 \times 10^{-5}$  M in 0.5 M H<sub>2</sub>SO<sub>4</sub>) as a standard.<sup>S2</sup>

### Synthesis of 2-methyl-5,5'-di(trimethylsilyl)-3,3'-bis-dithieno[2,3-*b*:3',2'-*d*]thiophene (**BDTT-Me**)

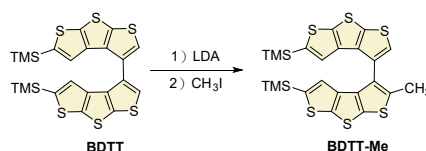

*n*-BuLi (2.5 M in hexane, 0.3 mL, 1.72 mmol, 2.3 equiv) was added dropwise to diisopropylamine (0.3 mL, 2.1 mmol, 2.8 equiv) in THF (5 mL) at 0 °C. After 2 h at 0 °C, the prepared LDA solution was transferred by syringe into a solution of **BDTT** (400.0 mg, 0.75 mmol) in THF (50 mL) at 0 °C. After 2 h at -78 °C, dry CH<sub>3</sub>I (0.14 mL, 2.25 mmol, 1.1 equiv) was added at -78 °C, then warmed up slowly to ambient temperature overnight. After being quenched with CH<sub>3</sub>OH at -78 °C, the reaction mixture was extracted with CH<sub>2</sub>Cl<sub>2</sub> (3 × 20 mL), and the organic phase was washed with H<sub>2</sub>O (3 × 30 mL) and then dried over Na<sub>2</sub>SO<sub>4</sub>. After the solvent was removed under vacuum, the residue was purified by column chromatography on silica gel with petrol ether as the eluent to obtain **BDTT-Me** as a white product (392.5 mg, 93%). M.p.: 181-182 °C. <sup>1</sup>H NMR (500 MHz, CDCl<sub>3</sub>)  $\delta$  (ppm) 7.52 (s, 1H), 6.46 (s, 1H), 6.40 (s, 1H), 2.12 (s, 3H), 0.11 (s, 9H), 0.03 (s, 9H). <sup>13</sup>C NMR (125 MHz, CDCl<sub>3</sub>)  $\delta$  (ppm) 144.07, 143.57, 143.42, 143.15, 140.75, 140.65, 139.59, 138.87, 138.62, 127.55, 126.96, 125.84, 125.61, 125.44, 125.30, 125.10, 13.56, -0.35. HRMS (MALDI-FT)  $m/z$  [M+H]<sup>+</sup> calcd for [C<sub>23</sub>H<sub>25</sub>S<sub>6</sub>Si<sub>2</sub>] 548.9818; found 548.9814. IR (KBr): 3052, 1413, 1229, 976, 851, 756 cm<sup>-1</sup>.

### Synthesis of 2-phenyl-5,5'-di(trimethylsilyl)-3,3'-bis-dithieno[2,3-*b*:3',2'-*d*]thiophene (**BDTT-Ph**)

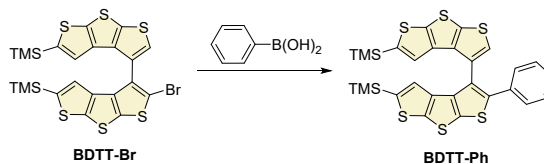

Compound **BDTT-Br** (40.0 mg, 0.065 mmol), phenylboronic acid (18.0 mg, 0.065 mmol, 1.0 equiv), Pd(PPh<sub>3</sub>)<sub>4</sub> (1.5 mg, 0.0013 mmol, 0.02 equiv), K<sub>2</sub>CO<sub>3</sub> (18.0 mg, 0.130 mmol, 2.0 equiv) and

deoxidized water (1 mL) were added into THF (10 mL). The reaction mixture was heated at 70 °C for 15 h. After cooling down to room, the reaction mixture was extracted with CH<sub>2</sub>Cl<sub>2</sub> (3 × 15 mL), and the organic phase was washed with H<sub>2</sub>O (3 × 20 mL) and then dried over Na<sub>2</sub>SO<sub>4</sub>. After the solvent was removed under vacuum, the residue was purified by column chromatography on silica gel with petrol ether as the eluent to obtain **BDTT-Ph** (37.7 mg, 95%) as a white solid. M.p.: 197-198 °C. <sup>1</sup>H NMR (500 MHz, CDCl<sub>3</sub>) δ (ppm) 7.35 (d, *J* = 10.0 Hz, 2H), 7.28 (s, 1H), 7.21-7.17 (m, 3H), 6.59 (d, *J* = 10.0 Hz, 2H), 0.13 (s, 9H), 0.12 (s, 9H). <sup>13</sup>C NMR (125 MHz, CDCl<sub>3</sub>) δ (ppm) 174.03, 143.79, 143.69, 143.52, 143.15, 142.44, 140.77, 140.20, 139.74, 138.72, 137.60, 137.00, 134.27, 128.59, 128.52, 128.32, 127.97, 127.66, 126.25, 125.88, 125.67, 123.97, -0.33, -0.35. HRMS (ESI-TOF) *m/z* [M+H]<sup>+</sup> calcd for [C<sub>28</sub>H<sub>27</sub>S<sub>6</sub>Si<sub>2</sub>] 610.9970; found 610.9983. IR (KBr): 2952, 1355, 1249, 982, 835, 756 cm<sup>-1</sup>.

#### Synthesis of 2-phenyl-5,5'-di(trimethylsilyl)-3,3'-bis-dithieno[2,3-*b*:3',2'-*d*]thiophene (**BDTT-1Np**)

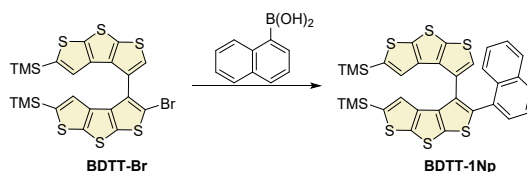

Compound **BDTT-Br** (69.0 mg, 0.112 mmol), 1-Naphthylboronic acid (21.2 mg, 0.123 mmol, 1.1 equiv), Pd(PPh<sub>3</sub>)<sub>4</sub> (2.6 mg, 0.0023 mmol, 0.02 equiv), K<sub>2</sub>CO<sub>3</sub> (30.3 mg, 0.22 mmol, 2.2 equiv) and deoxidized water (0.8 mL) were added into THF (8 mL). The reaction mixture was heated at 70 °C for 15 h. After cooling down to room, the reaction mixture was extracted with CH<sub>2</sub>Cl<sub>2</sub> (3 × 15 mL), and the organic phase was washed with H<sub>2</sub>O (3 × 20 mL) and then dried over Na<sub>2</sub>SO<sub>4</sub>. After the solvent was removed under vacuum, the residue was purified by column chromatography on silica gel with petrol ether as the eluent to obtain **BDTT-1Np** (61.5 mg, 83%) as a white solid. M.p.: 217-218 °C. <sup>1</sup>H NMR (500 MHz, CDCl<sub>3</sub>) δ (ppm) 7.98 (d, *J* = 8.4 Hz, 1H), 7.83 (d, *J* = 5.2 Hz, 2H), 7.53 (d, *J* = 6.1 Hz, 1H), 7.44-7.38 (m, 2H), 7.31 (s, 1H), 6.84 (s, 1H), 6.59 (s, 1H), 6.38 (s, 1H), 0.10 (s, 9H), 0.05 (s, 9H). <sup>13</sup>C NMR (125 MHz, CDCl<sub>3</sub>) δ (ppm) 143.79, 143.55, 143.12, 140.81, 140.27, 140.07, 139.25, 138.46, 137.49, 137.05, 133.44, 132.80, 132.13, 132.05, 131.95, 131.26, 129.91, 129.08, 128.55, 128.46, 128.22, 126.45, 126.29, 125.99, 125.78, 125.00, -0.34, -0.43. HRMS (ESI-TOF) *m/z* [M+H]<sup>+</sup> calcd for [C<sub>32</sub>H<sub>29</sub>S<sub>6</sub>Si<sub>2</sub>] 661.0127; found 661.0120. IR (KBr): 2947,



1469, 1259, 992, 973, 756  $\text{cm}^{-1}$ .

**Synthesis of 2,2'-phenyl-5,5'-di(trimethylsilyl)-3,3'-bis-dithieno[2,3-*b*:3',2'-*d*]thiophene (BDTT-2Np)**

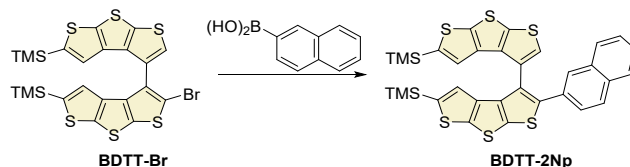

Compound **BDTT-Br** (40 mg, 0.065 mmol), 2-Naphthylboronic acid (47.3 mg, 0.072 mmol, 1.1 equiv),  $\text{Pd}(\text{PPh}_3)_4$  (1.5 mg, 0.0013 mmol, 0.02 equiv),  $\text{K}_2\text{CO}_3$  (18.0 mg, 0.130 mmol, 2.0 equiv) and deoxidized water (1 mL) were added into THF (10 mL). The reaction mixture was heated at 70  $^\circ\text{C}$  for 17 h. After cooling down to room, the reaction mixture was extracted with  $\text{CH}_2\text{Cl}_2$  ( $3 \times 15$  mL), and the organic phase was washed with  $\text{H}_2\text{O}$  ( $3 \times 20$  mL) and then dried over  $\text{Na}_2\text{SO}_4$ . After the solvent was removed under vacuum, the residue was purified by column chromatography on silica gel with petrol ether as the eluent to obtain **BDTT-2Np** (34.7 mg, 80%) as a white solid. M.p.: 211-212  $^\circ\text{C}$ .  $^1\text{H}$  NMR (500 MHz,  $\text{CDCl}_3$ )  $\delta$  (ppm) 7.91 (s, 1H), 7.72 (d,  $J = 6.1$  Hz, 2H), 7.60 (d,  $J = 8.9$  Hz, 1H), 7.44-7.41 (m, 2H), 7.35 (dd,  $J = 2, 8.7$  Hz, 1H), 7.28 (s, 1H), 6.63 (s, 1H), 6.59 (s, 1H), 0.13 (s, 9H), 0.08 (s, 9H).  $^{13}\text{C}$  NMR (125 MHz,  $\text{CDCl}_3$ )  $\delta$  (ppm) 143.89, 143.74, 143.52, 143.21, 142.47, 140.77, 140.19, 139.83, 138.75, 137.83, 137.08, 133.27, 132.53, 131.92, 128.05, 127.66, 127.64, 127.60, 127.58, 126.54, 126.51, 126.34, 126.24, 125.93, 125.79, 124.29, -0.36, -0.39. HRMS (ESI-TOF)  $m/z$   $[\text{M}+\text{H}]^+$  calcd for  $[\text{C}_{32}\text{H}_{29}\text{S}_6\text{Si}_2]$  661.0127; found 661.0125. IR (KBr): 2952, 1460, 1352, 1249, 984, 756  $\text{cm}^{-1}$ .

**Synthesis of 2-phenyl-5,5'-di(trimethylsilyl)-3,3'-bis-dithieno[2,3-*b*:3',2'-*d*]thiophene (BDTT-2An)**

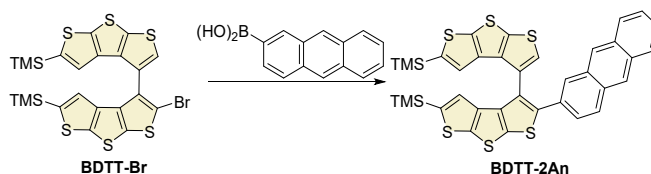

Compound **BDTT-Br** (100 mg, 0.162 mmol), 2-Anthraceneboronic acid (43.4 mg, 0.195 mmol, 1.2 equiv),  $\text{Pd}(\text{PPh}_3)_4$  (3.7 mg, 0.00324 mmol, 0.02 equiv),  $\text{K}_2\text{CO}_3$  (56.0 mg, 0.405 mmol, 2.5 equiv) and deoxidized water (1.5 mL) were added into toluene (15 mL). The reaction mixture was heated at 100  $^\circ\text{C}$  for 24 h. After cooling down to room, the reaction mixture was extracted with

CH<sub>2</sub>Cl<sub>2</sub> (3 × 15 mL), and the organic phase was washed with H<sub>2</sub>O (3 × 20 mL) and then dried over Na<sub>2</sub>SO<sub>4</sub>. After the solvent was removed under vacuum, the residue was purified by column chromatography on silica gel with petrol ether as the eluent to obtain **BDTT-2An** (90.9 mg, 82%) as a white solid. M.p.: 239-240 °C. <sup>1</sup>H NMR (500 MHz, CDCl<sub>3</sub>) δ (ppm) 8.30 (d, *J* = 6.6 Hz, 2H), 8.08 (s, 1H), 7.94 (d, *J* = 6.9 Hz, 2H), 7.76 (d, *J* = 11 Hz, 2H), 7.47-7.43 (m, 2H), 7.33-7.32 (m, 2H), 6.66 (s, 1H), 6.60 (s, 1H), 0.13 (s, 9H), 0.06 (s, 9H). <sup>13</sup>C NMR (125 MHz, CDCl<sub>3</sub>) δ (ppm) 143.35, 141.10, 140.59, 139.46, 139.24, 137.85, 137.62, 137.23, 134.38, 133.84, 133.79, 131.75, 131.41, 131.17, 129.13, 129.07, 128.96, 128.64, 128.54, 127.50, 127.41, 127.13, 126.83, 126.78, 126.73, 126.59, 126.38, 126.03, 125.67, 125.51, 125.49, -0.35, -0.41. HRMS (ESI-TOF) *m/z* [M+H]<sup>+</sup> calcd for [C<sub>36</sub>H<sub>31</sub>S<sub>6</sub>Si<sub>2</sub>] 711.0283; found 711.0276. IR (KBr): 2955, 1465, 1350, 1180, 977, 756 cm<sup>-1</sup>.

#### Synthesis of 2-phenyl-5,5'-di(trimethylsilyl)-3,3'-bis-dithieno[2,3-*b*:3',2'-*d*]thiophene (**BDTT-9An**)

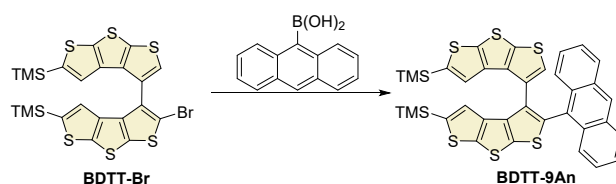

Compound **BDTT-Br** (100 mg, 0.162 mmol), 9-Anthraceneboronic acid (43.4 mg, 0.195 mmol, 1.2 equiv), Pd(PPh<sub>3</sub>)<sub>4</sub> (3.7 mg, 0.00324 mmol, 0.02 equiv), K<sub>2</sub>CO<sub>3</sub> (56.0 mg, 0.405 mmol, 2.5 equiv) and deoxidized water (1 mL) were added into toluene (10 mL). The reaction mixture was heated at 100 °C for 36 h. After cooling down to room, the reaction mixture was extracted with CH<sub>2</sub>Cl<sub>2</sub> (3 × 15 mL), and the organic phase was washed with H<sub>2</sub>O (3 × 20 mL) and then dried over Na<sub>2</sub>SO<sub>4</sub>. After the solvent was removed under vacuum, the residue was purified by column chromatography on silica gel with petrol ether as the eluent to obtain **BDTT-9An** (86.5 mg, 75%) as a white solid. M.p.: 262-263 °C. <sup>1</sup>H NMR (500 MHz, CDCl<sub>3</sub>) δ (ppm) 8.51 (s, 1H), 8.23 (d, *J* = 6.7 Hz, 1H), 8.08 (d, *J* = 8.0 Hz, 1H), 7.92 (d, *J* = 8.6 Hz, 1H), 7.67 (d, *J* = 8.9 Hz, 1H), 7.58-7.52 (m, 1H), 7.28 (t, *J* = 6.6 Hz, 1H), 7.09 (t, *J* = 7.7 Hz, 1H), 6.67 (s, 1H), 6.61 (s, 1H), 6.27 (s, 1H), 0.12 (s, 9H), 0.03 (s, 9H). <sup>13</sup>C NMR (125 MHz, CDCl<sub>3</sub>) δ (ppm) 143.61, 143.09, 140.84, 140.32, 139.20, 139.01, 137.59, 137.36, 136.97, 134.12, 133.58, 133.52, 131.49, 131.15, 130.91, 130.62, 128.87, 128.81, 128.70, 128.28, 126.87, 126.57, 126.52, 126.47, 126.33, 126.12, 125.77, 125.41,

125.25, 125.23, -0.30, -0.45. HRMS (ESI-TOF)  $m/z$   $[M+H]^+$  calcd for  $[C_{36}H_{31}S_6Si_2]$  711.0283; found 711.0288. IR (KBr): 2955, 1463, 1350, 1250, 939, 756  $cm^{-1}$ .

## Synthesis of 2-phenyl-5,5'-di(trimethylsilyl)-3,3'-bis-dithieno[2,3-*b*:3',2'-*d*]thiophene (BDTT-1Py)

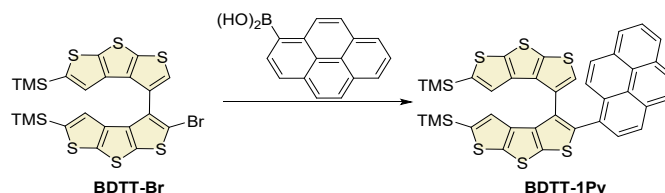

Compound **BDTT-Br** (65.3 mg, 0.11 mmol), 1-Pyrenylboronic acid (13.0 mg, 0.11 mmol, 1.0 equiv),  $Pd(PPh_3)_4$  (2.5 mg, 0.002 mmol, 0.02 equiv),  $K_2CO_3$  (36.8 mg, 0.27 mmol, 2.5 equiv) and deoxidized water (1 mL) were added into toluene (10 mL). The reaction mixture was heated at 100  $^{\circ}C$  for 20 h. After cooling down to room, the reaction mixture was extracted with  $CH_2Cl_2$  ( $3 \times 15$  mL), and the organic phase was washed with  $H_2O$  ( $3 \times 20$  mL) and then dried over  $Na_2SO_4$ . After the solvent was removed under vacuum, the residue was purified by column chromatography on silica gel with petrol ether as the eluent to obtain **BDTT-1Py** (61.8 mg, 75%) as a white solid. M.p.: 290-291  $^{\circ}C$ .  $^1H$  NMR (500 MHz,  $CDCl_3$ )  $\delta$  (ppm) 8.20 (d,  $J = 9.5$  Hz, 2H), 8.14-8.06 (m, 5H), 8.02 (t,  $J = 9.5$  Hz, 2H), 6.82 (s, 1H), 6.67 (s, 1H), 6.40 (s, 1H), 0.12 (s, 9H), 0.06 (s, 9H).  $^{13}C$  NMR (125 MHz,  $CDCl_3$ )  $\delta$  (ppm) 143.79, 143.55, 143.12, 140.81, 140.27, 140.07, 139.25, 138.46, 137.49, 137.05, 133.44, 132.80, 132.13, 132.05, 131.95, 131.26, 129.91, 129.08, 128.55, 128.46, 128.22, 126.45, 126.29, 125.99, 125.89, 125.78, 125.00, -0.34, -0.43. HRMS (MALDI-FT)  $m/z$   $[M]^+$  calcd for  $[C_{38}H_{30}S_6Si_2]$  751.0596; found 751.0624. IR (KBr): 2952, 1403, 1350, 1249, 1113, 984, 756  $cm^{-1}$ .

## 2. NMR and HRMS Spectra

### NMR and HRMS Spectra of BDTT-Me

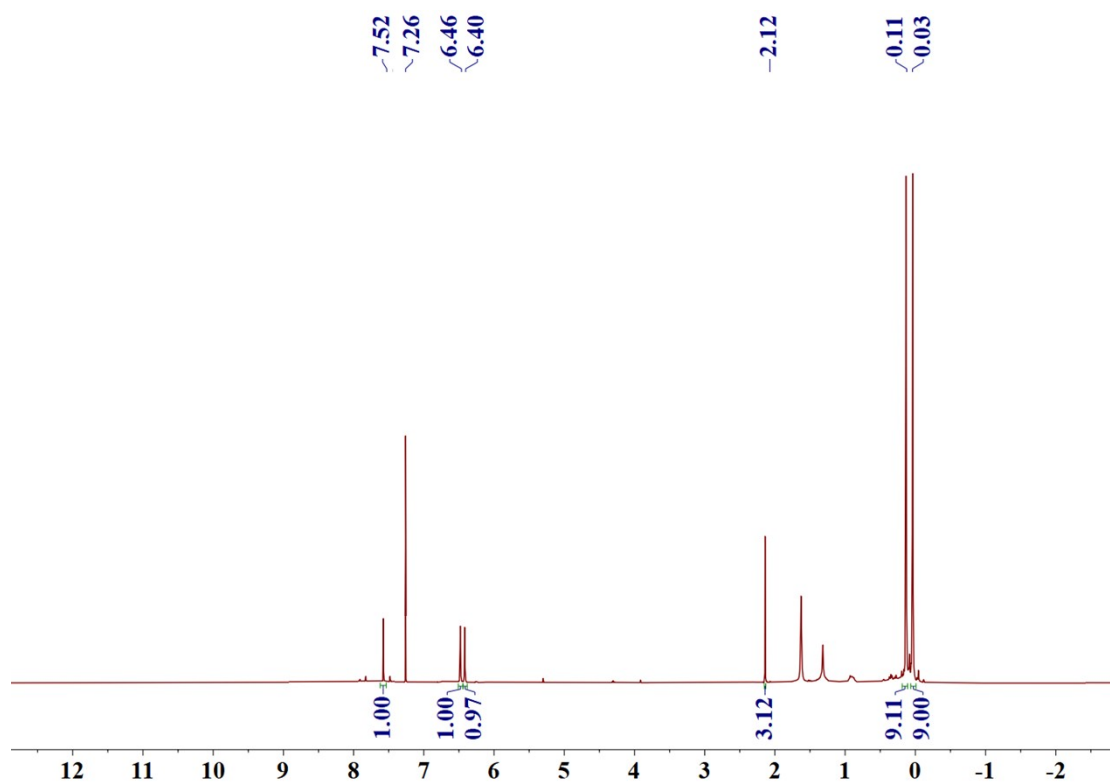

Figure S1. <sup>1</sup>H NMR (500 MHz, CDCl<sub>3</sub>) spectrum of **BDTT-Me**.

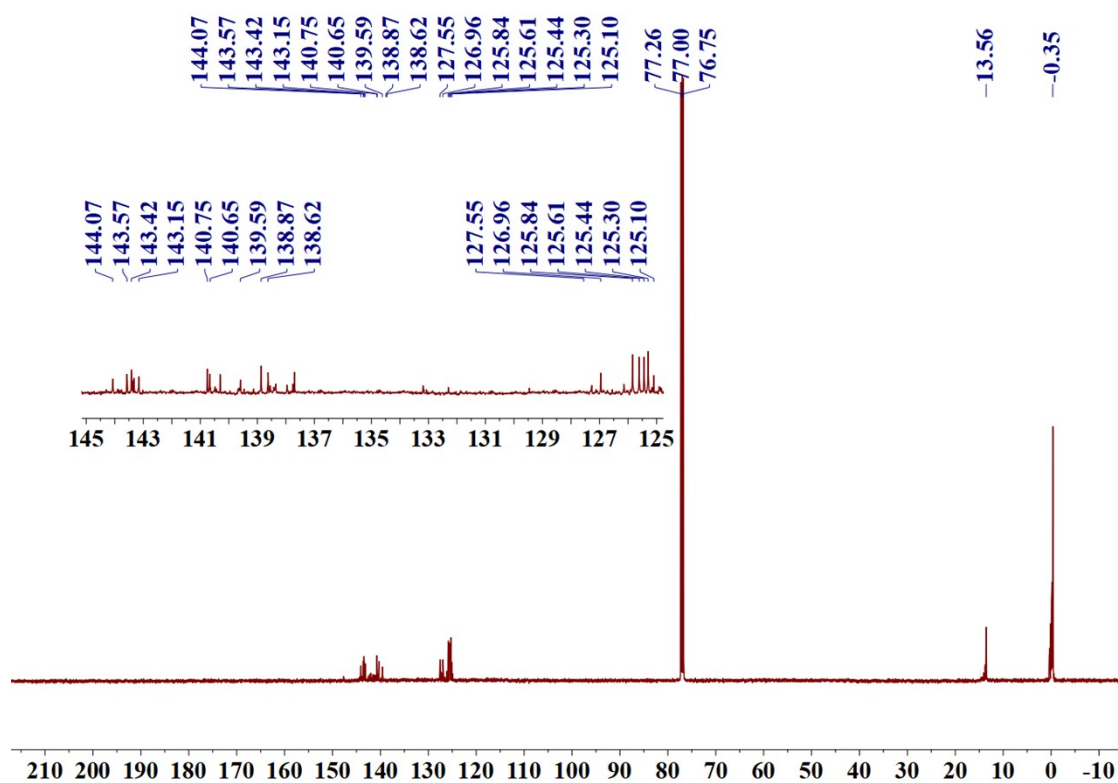

Figure S2. <sup>13</sup>C NMR (125 MHz, CDCl<sub>3</sub>) spectra of **BDTT-Me**.

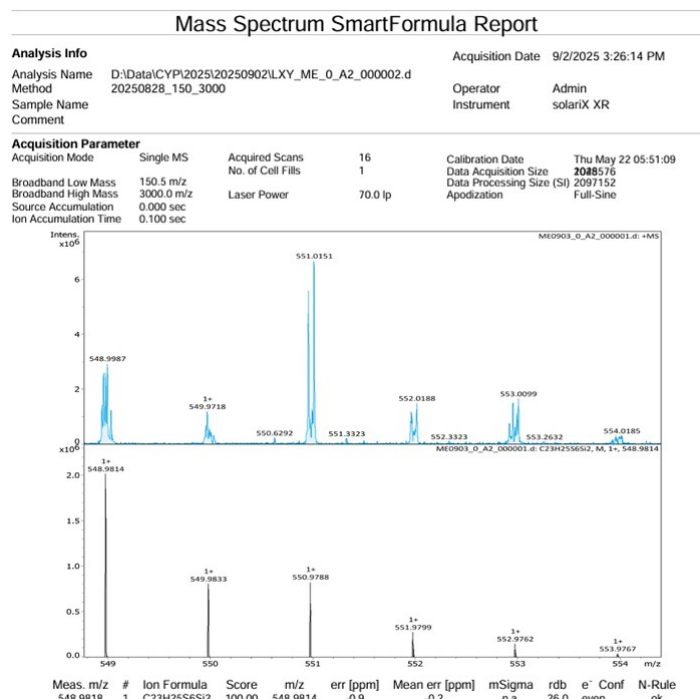

Figure S3. HRMS spectra of **BDTT-Me**.

## NMR and HRMS Spectra of **BDTT-Ph**

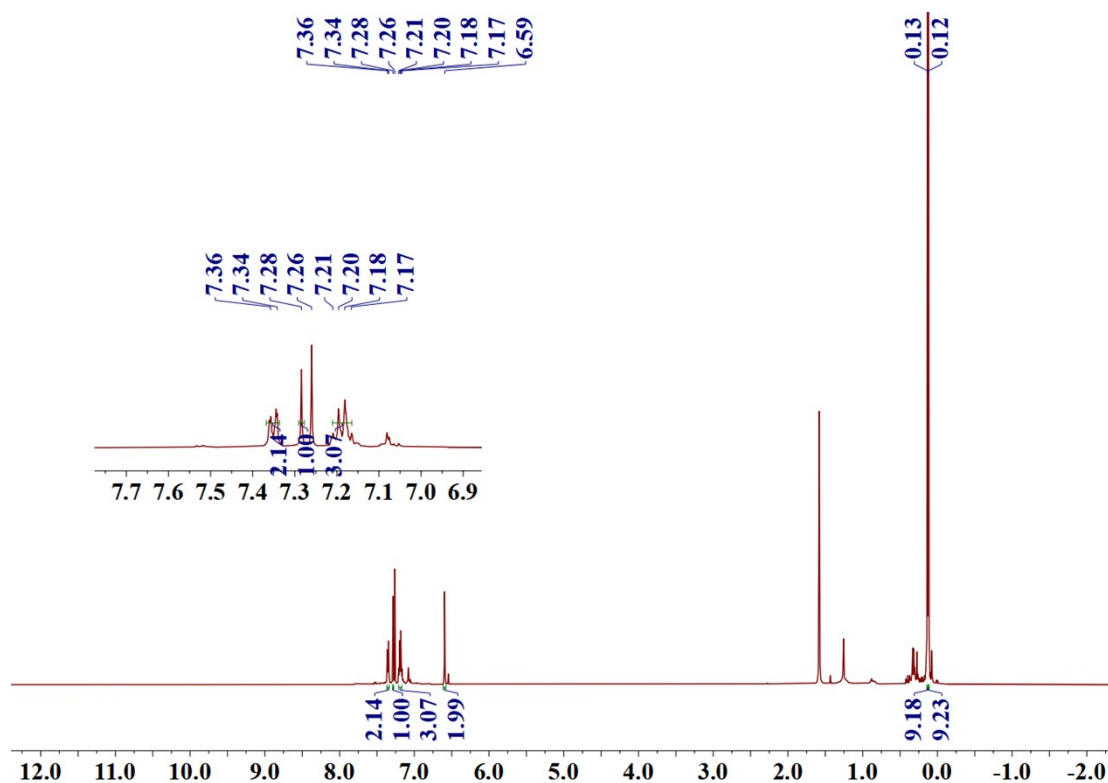

Figure S4.  $^1\text{H}$  NMR (500 MHz,  $\text{CDCl}_3$ ) spectra of **BDTT-Ph**.

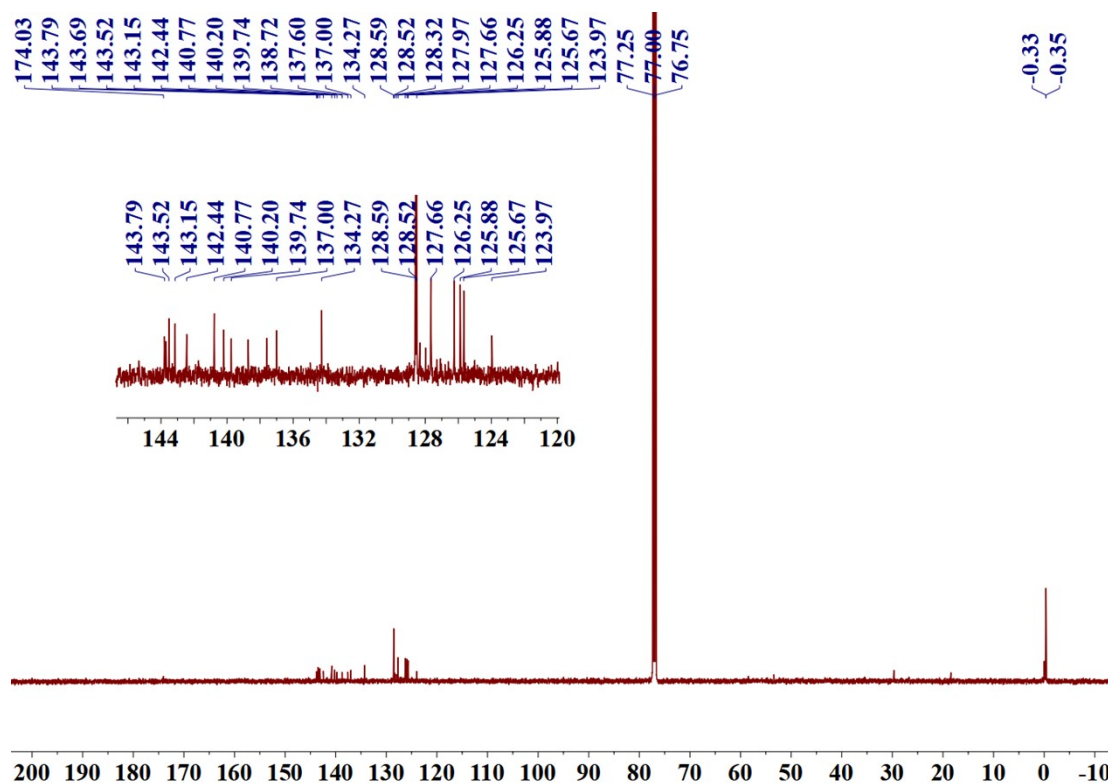

Figure S5.  $^{13}\text{C}$  NMR (125 MHz,  $\text{CDCl}_3$ ) spectra of **BDTT-Ph**.

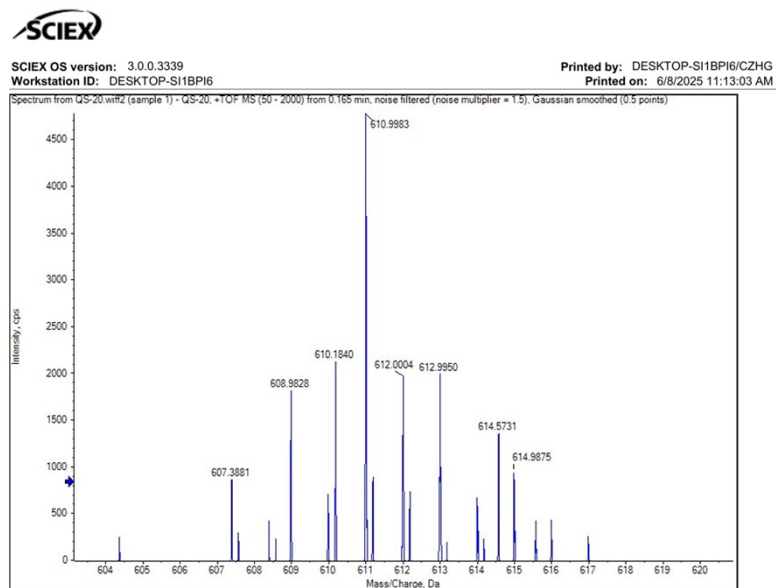

Figure S6. HRMS spectrum of **BDTT-Ph**.

# NMR and HRMS Spectra of BDTT-1Np

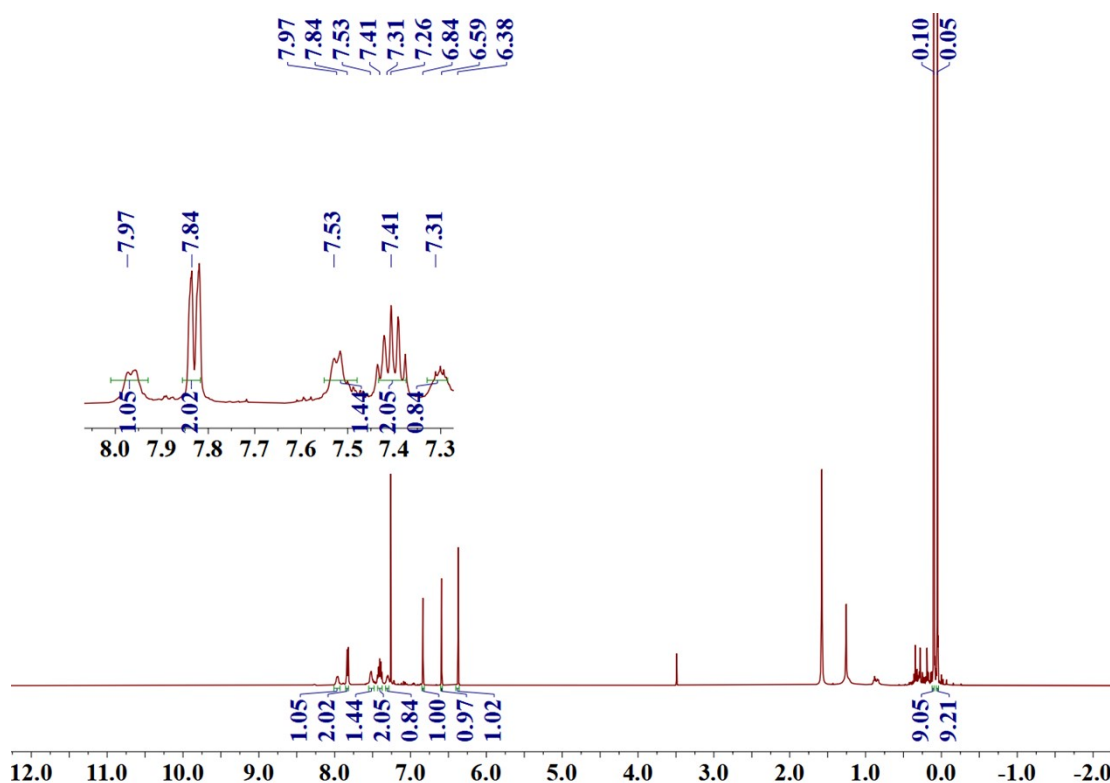

Figure S7. <sup>1</sup>H NMR (500 MHz, CDCl<sub>3</sub>) spectra of BDTT-1Np.

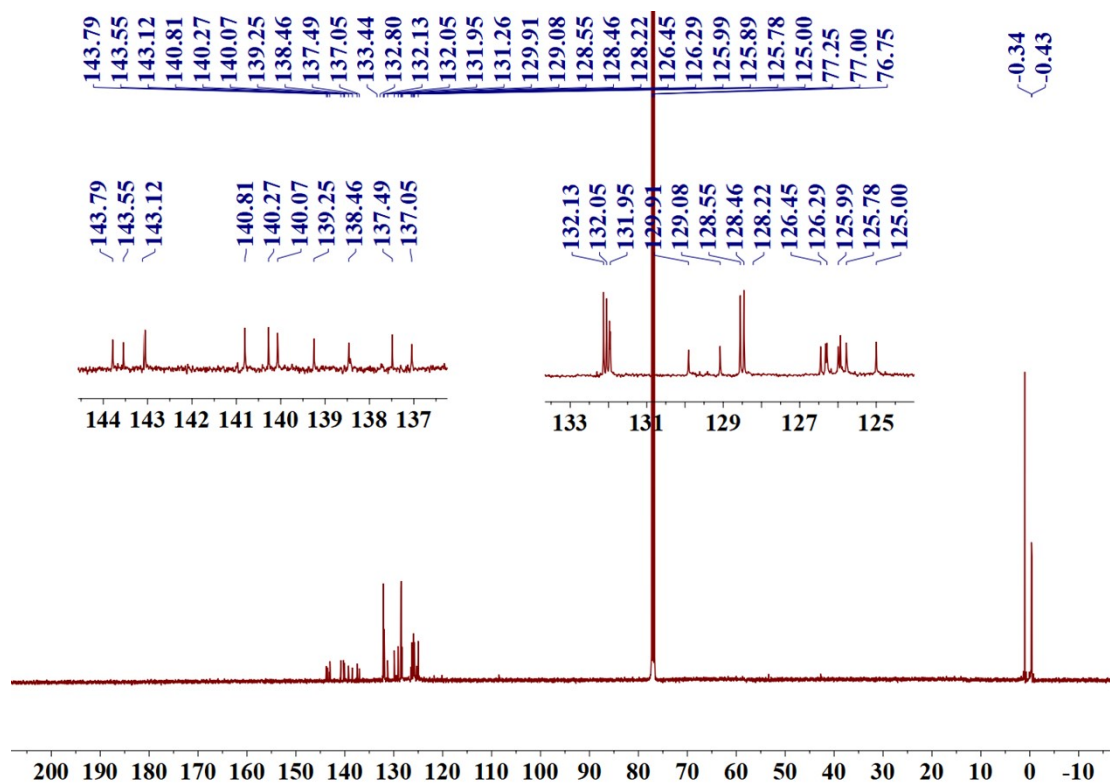

Figure S8. <sup>13</sup>C NMR (125 MHz, CDCl<sub>3</sub>) spectra of BDTT-1Np.

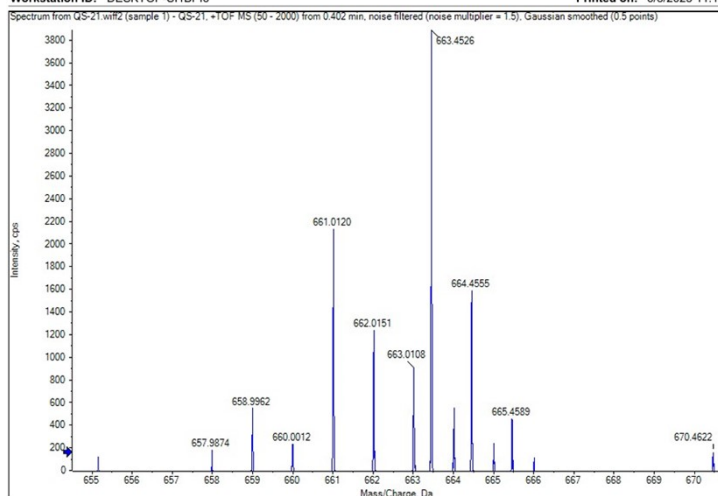

Figure S9. HRMS spectrum of **BDTT-1Np**.

# NMR and HRMS Spectra of **BDTT-2Np**

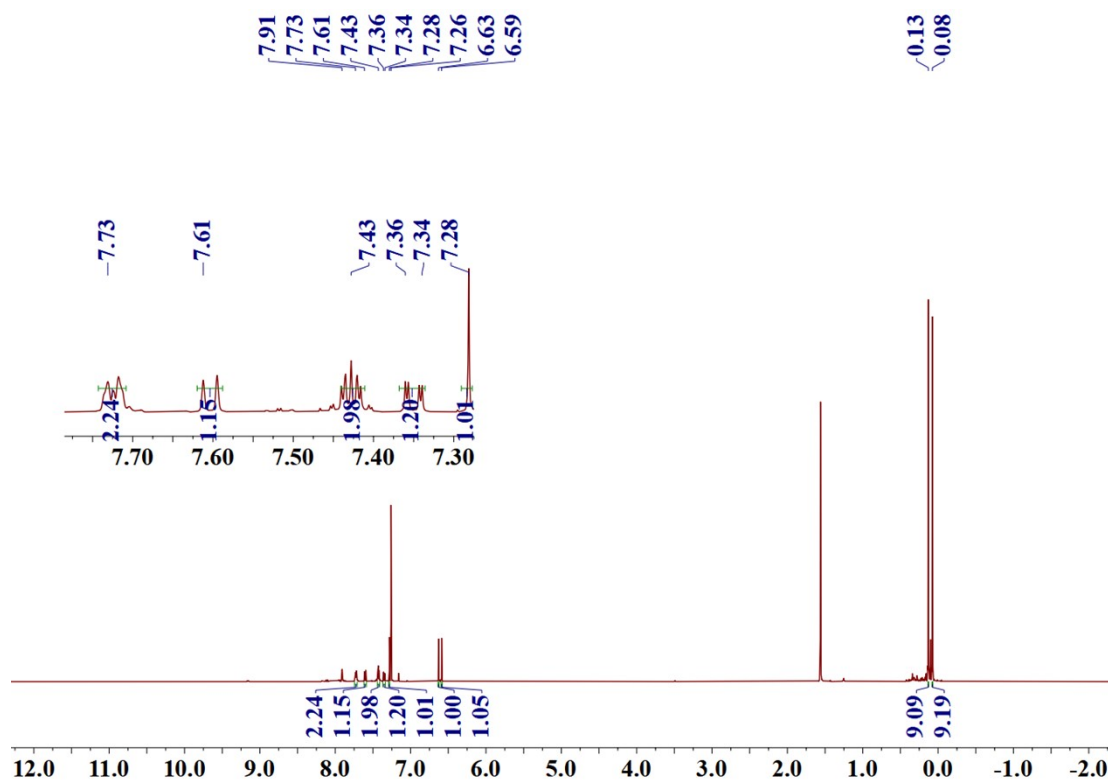

Figure S10. <sup>1</sup>H NMR (500 MHz, CDCl<sub>3</sub>) spectra of **BDTT-2Np**.



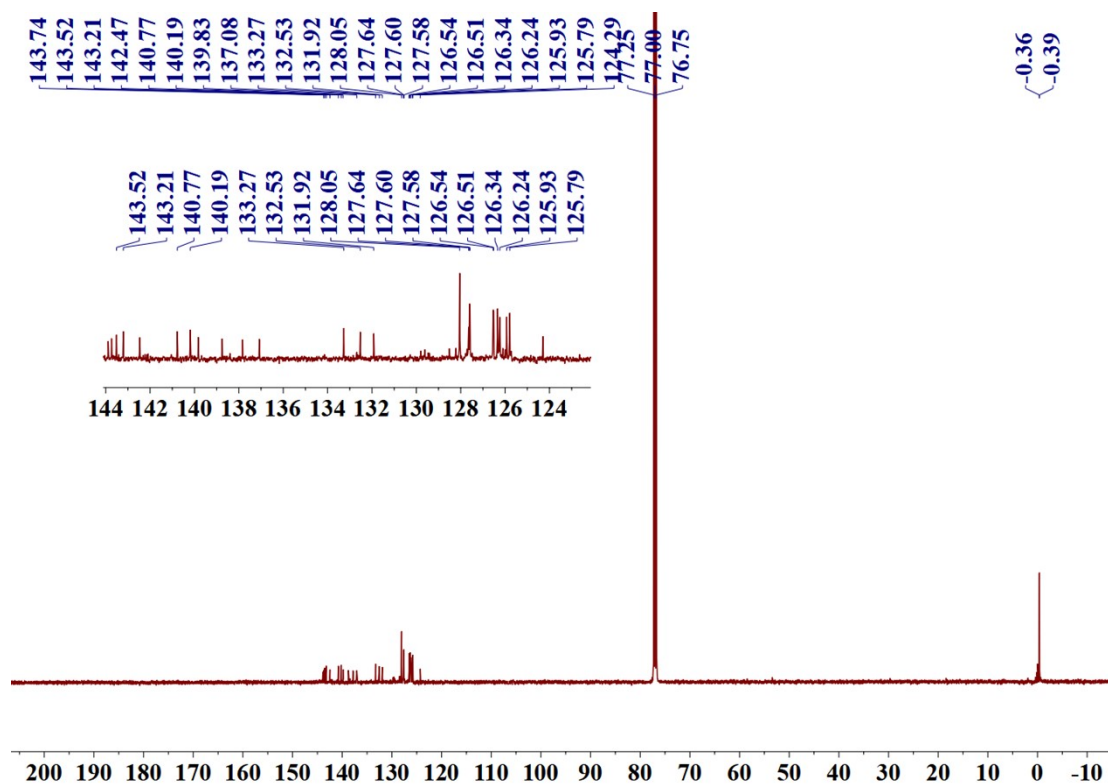

Figure S11.  $^{13}\text{C}$  NMR (125 MHz,  $\text{CDCl}_3$ ) spectra of **BDTT-2Np**.

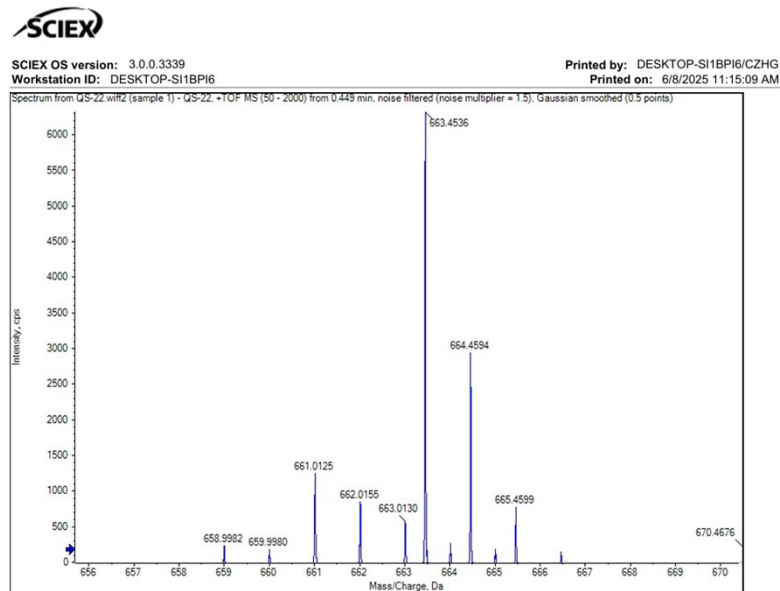

Figure S12. HRMS spectrum of **BDTT-2Np**.

# NMR and HRMS Spectra of BDTT-2An

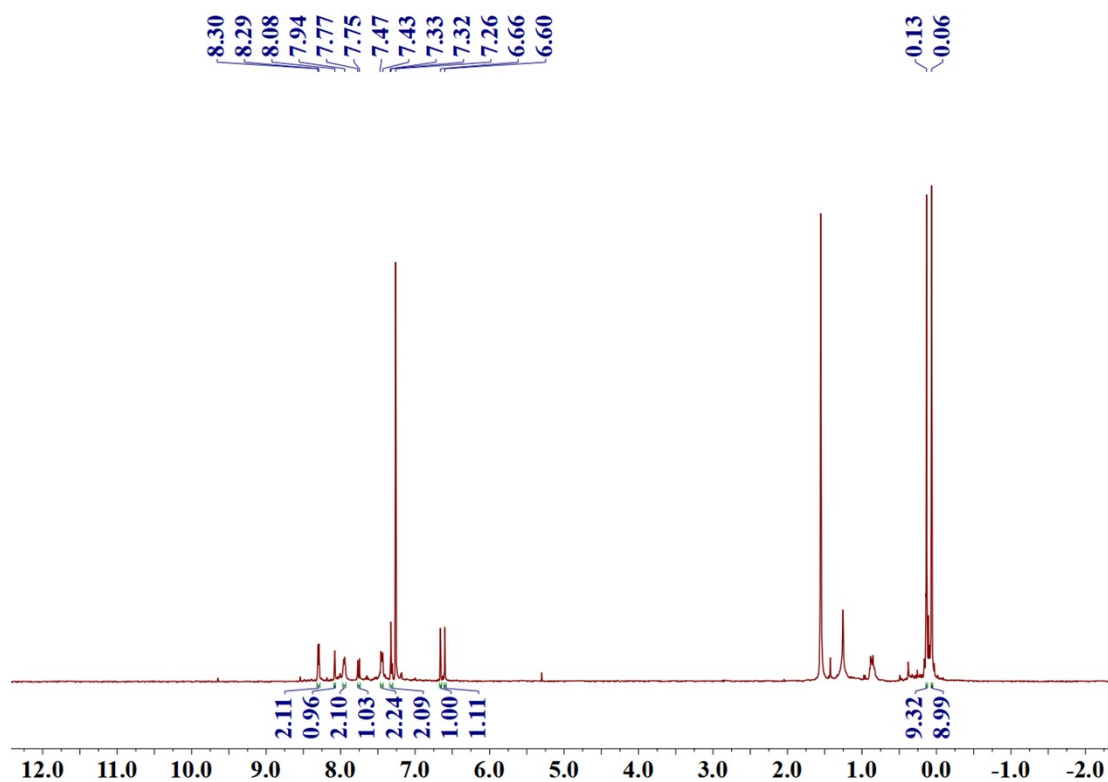

Figure S13. <sup>1</sup>H NMR (500 MHz, CDCl<sub>3</sub>) spectrum of **BDTT-2An**.

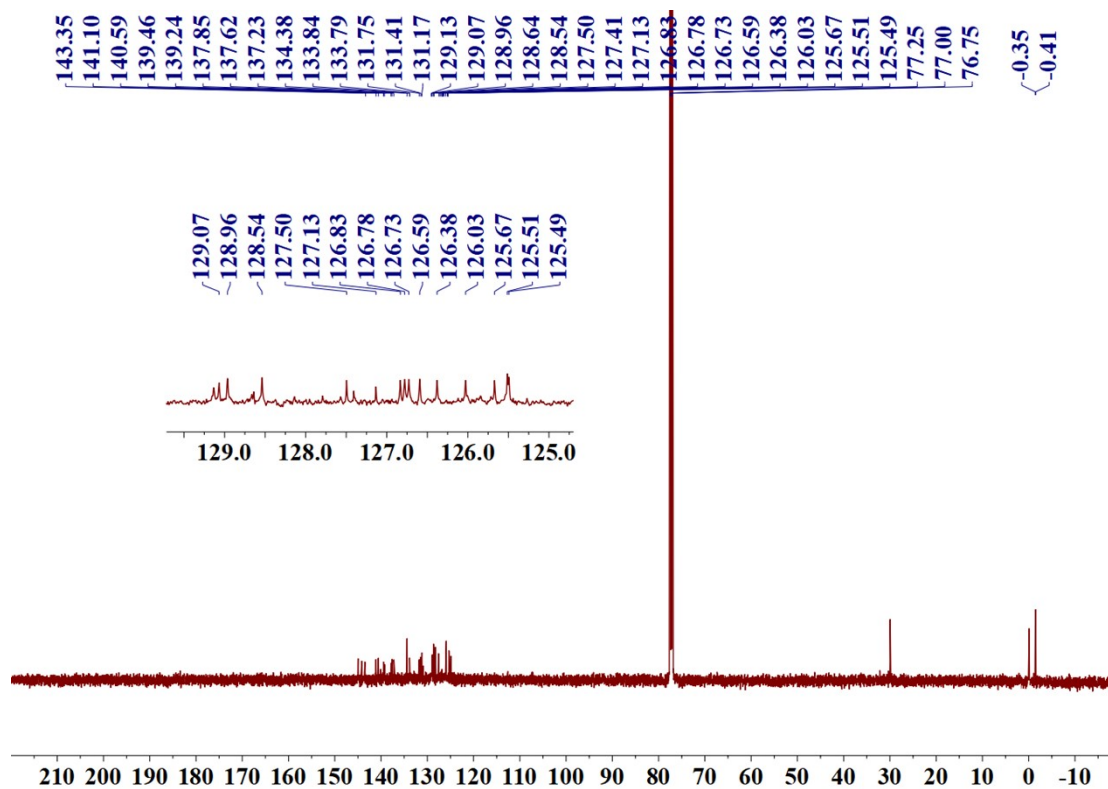

Figure S14. <sup>13</sup>C NMR (125 MHz, CDCl<sub>3</sub>) spectra of **BDTT-2An**.

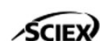

SCIEX OS version: 3.0.0.3339  
Workstation ID: DESKTOP-S11BP16

Printed by: DESKTOP-S11BP16/CZHG  
Printed on: 6/8/2025 11:16:46 AM

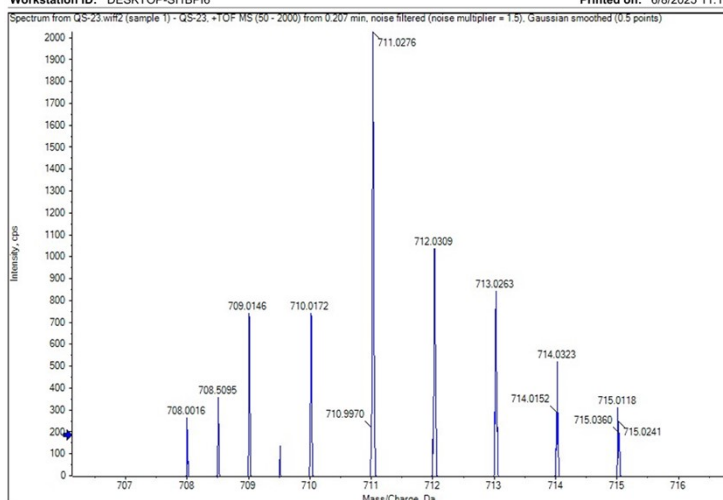

Figure S15. HRMS spectrum of **BDTT-2An**.

### NMR and HRMS Spectra of BDTT-9An

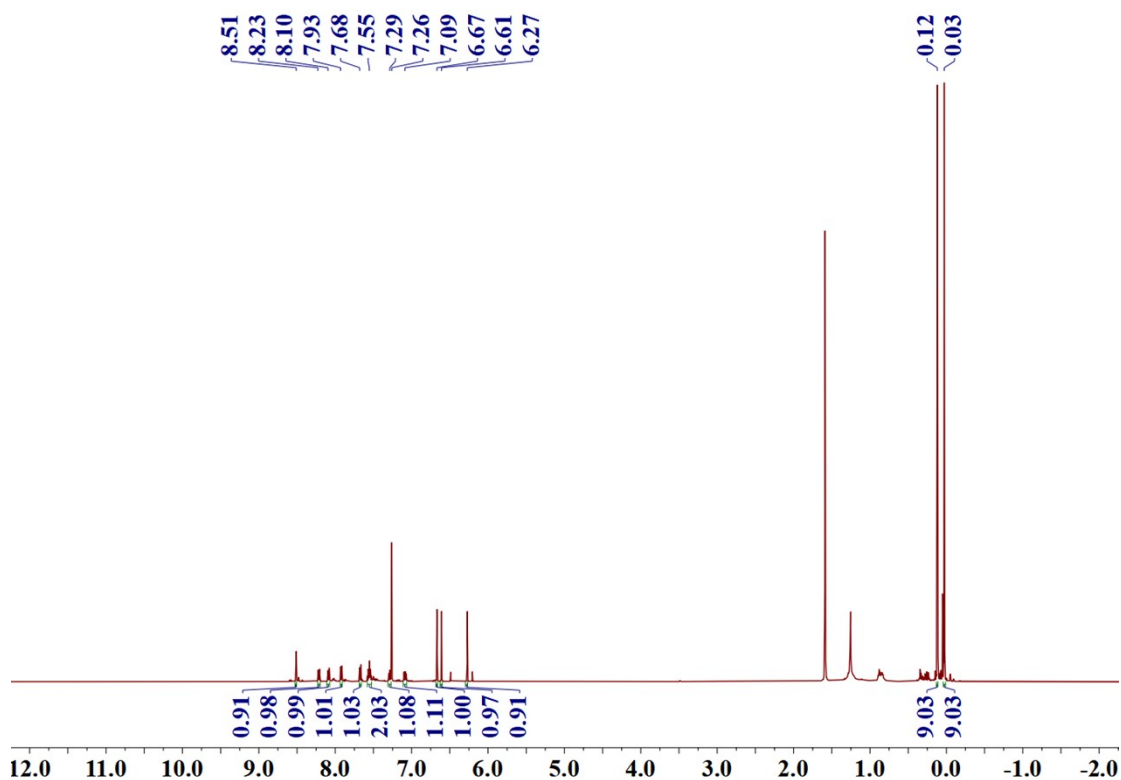

Figure S16. <sup>1</sup>H NMR (500 MHz, CDCl<sub>3</sub>) spectrum of **BDTT-9An**.

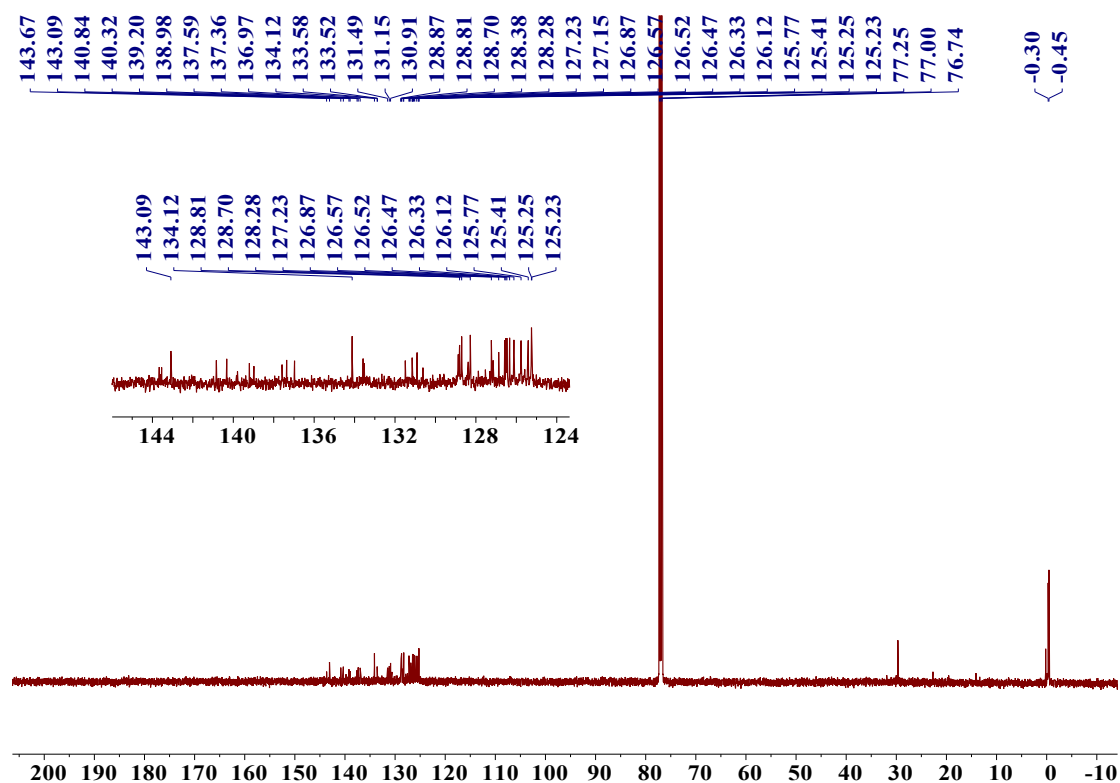

Figure S17.  $^{13}\text{C}$  NMR (125 MHz,  $\text{CDCl}_3$ ) spectra of **BDTT-9An**.

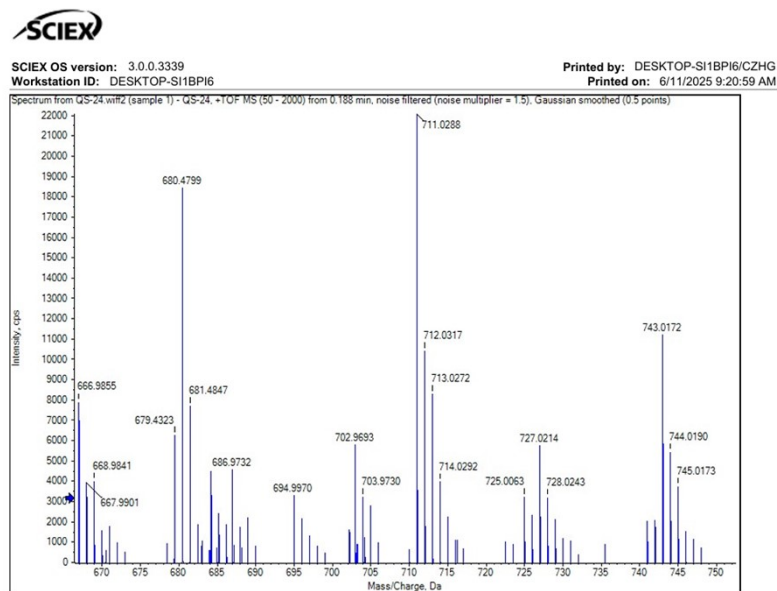

Figure S18. HRMS spectrum of **BDTT-9An**.

# NMR and HRMS Spectra of BDTT-1Py

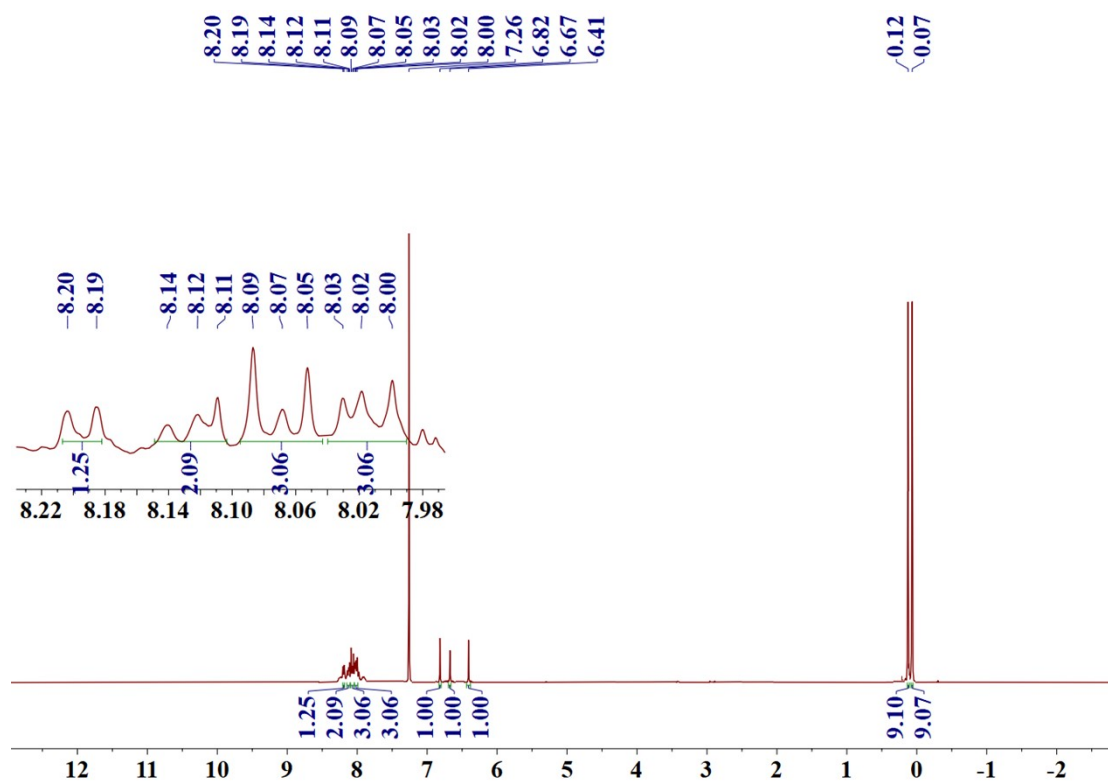

Figure S19. <sup>1</sup>H NMR (500 MHz, CDCl<sub>3</sub>) spectra of **BDTT-1Py**.

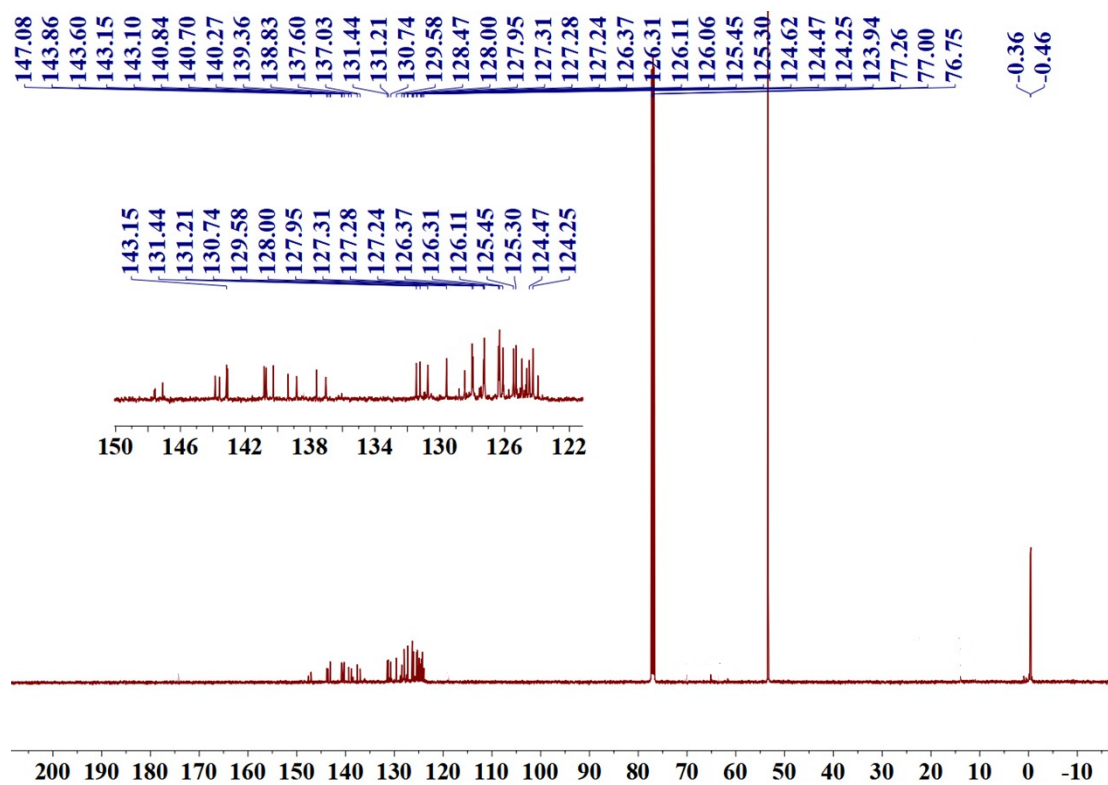

Figure S20.  $^{13}\text{C}$  NMR (125 MHz,  $\text{CDCl}_3$ ) spectra of **BDTT-1Py**.

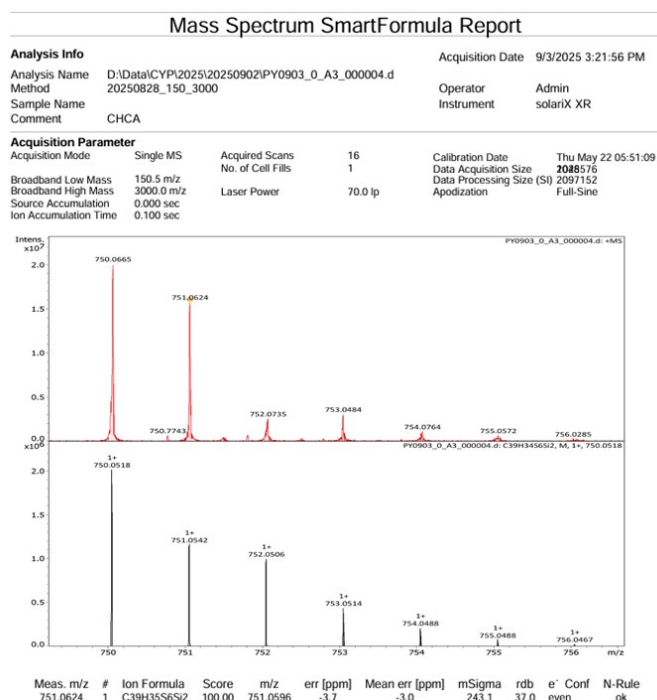

Figure S21. HRMS spectra of **BDTT-1Py**

### 3. Resolution, optical rotations, and racemization of **BDTT-Ars**

#### Resolution of **BDTT-Me** and optical rotations

The resolution of the **BDTT-Me** was carried out by chiral HPLC. The two enantiomers were obtained on a semipreparative scaled chiral column (CHIRALPAK-IB dimension: 10 mm $\phi$   $\times$  250 mmL); eluent: hexane; Injection information: concentration, 2.5 mg/mL and volume: 40  $\mu\text{L}$ /injection. From the 3 mg scale of **BDTT-Me**, 1.0 mg ( $ee > 99\%$ ) of (–)-**BDTT-Me** and 1.1 mg ( $ee > 99\%$ ) of (+)-**BDTT-Me** were efficiently obtained. The optical rotations of (–)-**BDTT-Me**,  $[\alpha]_D^{25} = -173^\circ$  ( $c = 0.33$  mg/mL in DCM) and (+)-**BDTT-Me**,  $[\alpha]_D^{25} = +155^\circ$  ( $c = 0.37$  mg/mL in DCM) were observed.

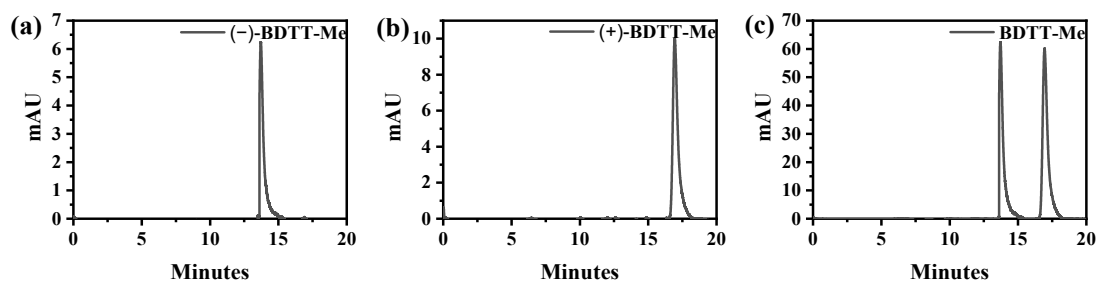

Figure S22. HPLC trace of (–)-**BDTT-Me** (a,  $ee > 99\%$ ), (+)-**BDTT-Me** (b,  $ee > 99\%$ ) and **BDTT-**

**Me** (c) at room temperature. Resolution of **BDTT-Me** by chiral HPLC monitored at 254 nm was performed with a CHIRALPAK IB column. Eluent: hexane, Flow Rate: 2.5 mL/min, Column: CHIRALPAK-IB.

#### Racemization of (+)-**BDTT-Me**

Racemization of (+)-**BDTT-Me** was carried out in CH<sub>2</sub>Cl<sub>2</sub> by heating at different temperatures. The process was monitored from time to time by chiral HPLC (CHIRALPAK-IB) with hexane as eluent. The half-life of racemization of (+)-**BDTT-Me** is proposed as below:

|       | (+)- <b>BDTT-Me</b> | (+)- <b>BDTT-Me</b>             |
|-------|---------------------|---------------------------------|
| t = 0 | C <sub>0</sub>      | 0                               |
| t = t | C <sub>t</sub>      | C <sub>0</sub> - C <sub>t</sub> |

The racemization of (+)-**BDTT-Me** could be taken as first-order reaction, so

$$\ln(C_0/C_t) = kt$$

Here, C<sub>0</sub> is the concentration of (+)-**BDTT-Me** before heating, and C<sub>t</sub> is the concentration of (+)-**BDTT-Me** after heating for time of t.

Because

$$ee = \frac{C_t - (C_0 - C_t)}{C_t + (C_0 - C_t)} = \frac{2C_t - C_0}{C_0} = 2\frac{C_t}{C_0} - 1$$

$$\Rightarrow \frac{C_t}{C_0} = \frac{ee + 1}{2}$$

So, we can obtain the formula as below:

$$\ln \frac{C_0}{C_t} = \ln \frac{2}{ee + 1} = kt$$

$$\Rightarrow \ln \frac{ee + 1}{2} = -kt$$

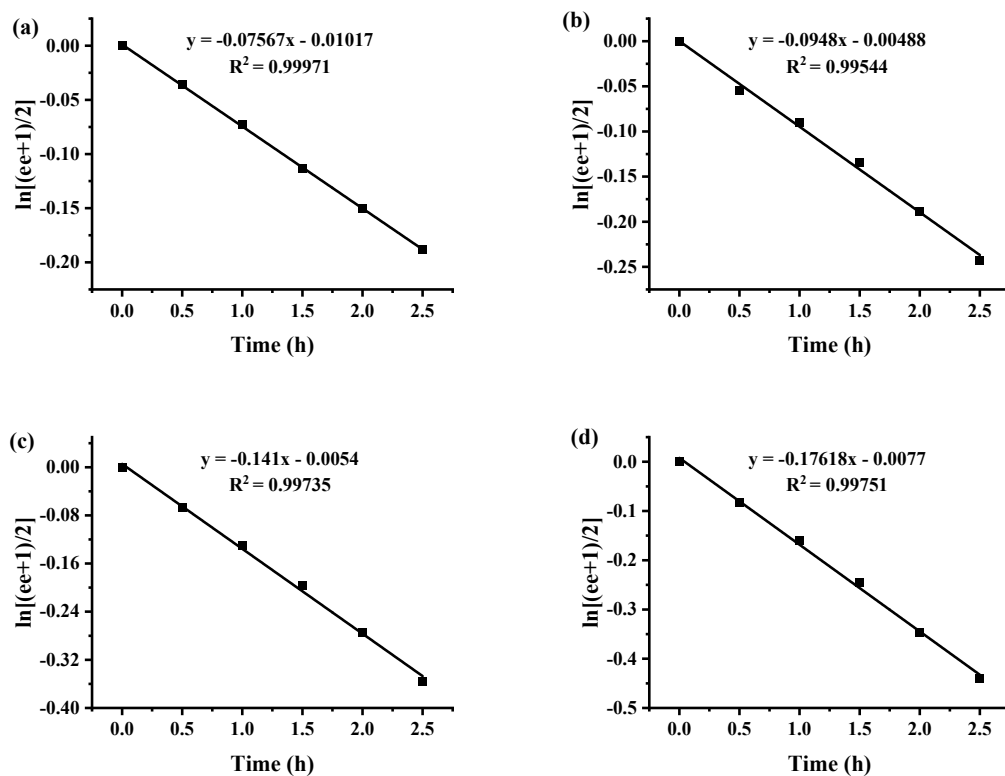

Figure S23. Time-dependent enantiomeric excess value decay profiles at (a) 40 °C, (b) 50 °C, (c) 60 °C, and (d) 70 °C, respectively.

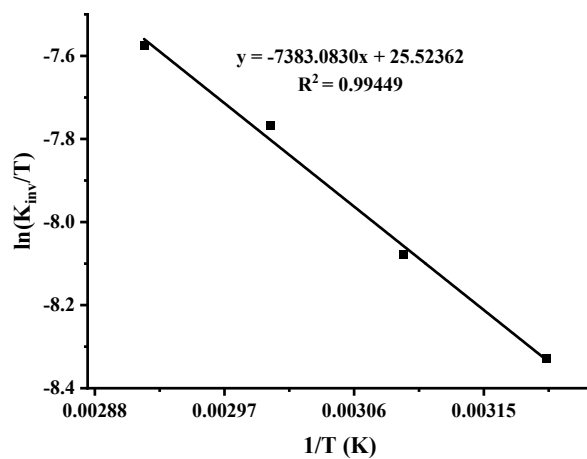

Figure S24. The half-life of (+)-BDTT-Me at different temperatures.

Table S1. The half-life of (+)-BDTT-Me at different temperatures.

| T/°C        | 40  | 50  | 60  | 70  |
|-------------|-----|-----|-----|-----|
| $t_{1/2}/h$ | 9.3 | 7.3 | 4.9 | 3.9 |



Table S2. The inversion barriers of (+)-**BDTT-Me** (R/S).

| Compound            | $\Delta H/\text{kcal/mol}$ | $\Delta S/\text{J/k}$ | $\Delta G/\text{kcal/mol}$ |
|---------------------|----------------------------|-----------------------|----------------------------|
| (+)- <b>BDTT-Me</b> | 14.68                      | 14.67                 | 13.72                      |

### Resolution of **BDTT-Ph** and optical rotations

The resolution of the **BDTT-Ph** was carried out by chiral HPLC. The two enantiomers were obtained on a semipreparative scaled chiral column (CHIRALPAK-IB dimension: 10 mm $\phi$   $\times$  250 mmL); eluent: hexane; Injection information: concentration, 2.5 mg/mL and volume: 100  $\mu$ L/injection. From the 8 mg scale of **BDTT-Ph**, 1.9 mg (*ee* > 99%) of (–)-**BDTT-Ph** and 2.1 mg (*ee* > 99%) of (+)-**BDTT-Ph** were efficiently obtained. The optical rotations of (–)-**BDTT-Ph**,  $[\alpha]_D^{25} = -675^\circ$  (*c* = 0.30 mg/mL in DCM) and (+)-**BDTT-Ph**,  $[\alpha]_D^{25} = +692^\circ$  (*c* = 0.32 mg/mL in DCM) were observed.

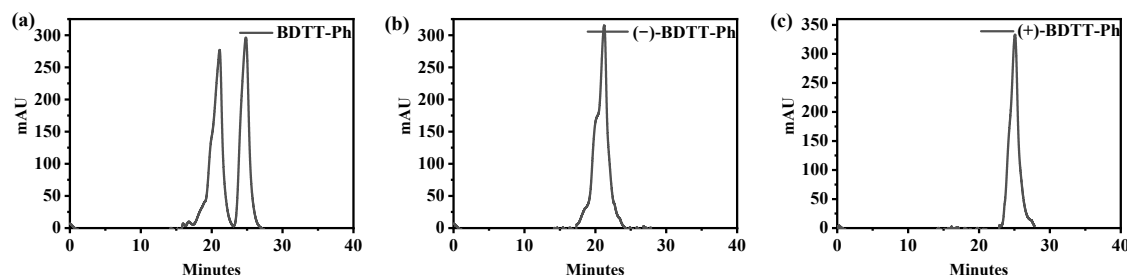

Figure S25. HPLC trace of **BDTT-Ph** (a), (–)-**BDTT-Ph** (b, *ee* > 99%) and (+)-**BDTT-Ph** (c, *ee* > 99%) at room temperature. Resolution of **BDTT-Ph** by chiral HPLC monitored at 254 nm was performed with a CHIRALPAK IB column. Eluent: hexane, Flow Rate: 2.5 mL/min, Column: CHIRALPAK-IB.

### Racemization of (+)-**BDTT-Ph**

Racemization of (+)-**BDTT-Ph** was carried out in CH<sub>2</sub>Cl<sub>2</sub> by heating at different temperatures. The process was monitored from time to time by chiral HPLC (CHIRALPAK-IB) with hexane as eluent. The half-life of (+)-**BDTT-Ph** was studied using the same method as for (+)-**BDTT-Me**:

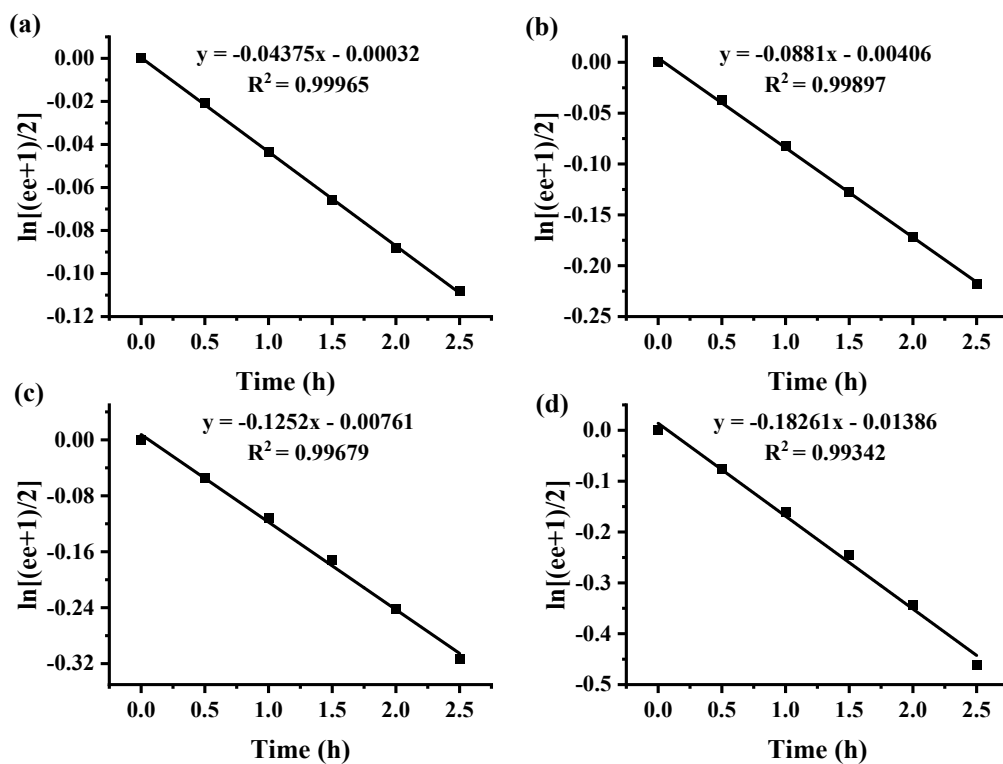

Figure S28. Time-dependent enantiomeric excess value decay profiles at (a) 50 °C, (b) 60 °C, (c) 70 °C, and (d) 80 °C, respectively.

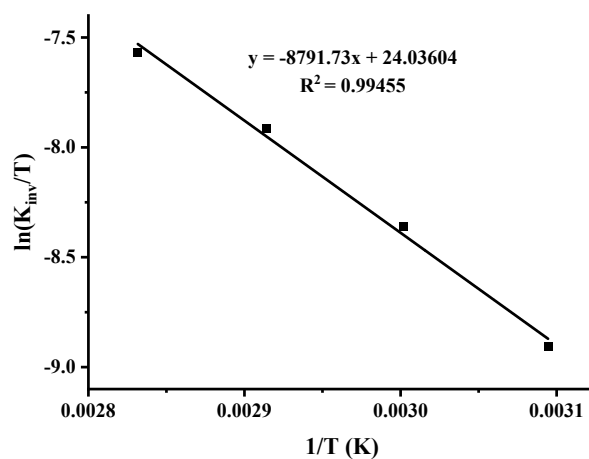

Figure S29. The half-life of (+)-BDTT-Ph at different temperatures.

Table S3. The half-life of (+)-**BDTT-Ph** at different temperatures.

| T/°C        | 50   | 60  | 70  | 80  |
|-------------|------|-----|-----|-----|
| $t_{1/2}/h$ | 16.0 | 7.9 | 5.5 | 3.8 |

Table S4. The inversion barriers of (+)-**BDTT-Ph** (R/S).

| Compound            | $\Delta H/\text{kcal/mol}$ | $\Delta S/\text{J/k}$ | $\Delta G/\text{kcal/mol}$ |
|---------------------|----------------------------|-----------------------|----------------------------|
| (+)- <b>BDTT-Ph</b> | 17.47                      | 2.31                  | 17.32                      |

### Resolution of **BDTT-1Np** and optical rotations

The resolution of the **BDTT-1Np** was carried out by chiral HPLC. The two enantiomers were obtained on a semipreparative scaled chiral column (CHIRALPAK-IB dimension: 10 mm $\phi$   $\times$  250 mmL); eluent: hexane/dichloromethane (7/1, v/v); Injection information: concentration, 1 mg/mL and volume: 100  $\mu\text{L}$ /injection. From the 4 mg scale of **BDTT-1Np**, 1.5 mg ( $ee > 99\%$ ) of (+)-**BDTT-1Np** and 1.7 mg ( $ee > 99\%$ ) of (–)-**BDTT-1Np** were efficiently obtained. The optical rotations of (–)-**BDTT-1Np**,  $[\alpha]_D^{25} = -897^\circ$  ( $c = 0.34$  mg/mL in DCM) and (+)-**BDTT-1Np**,  $[\alpha]_D^{25} = +842^\circ$  ( $c = 0.30$  mg/mL in DCM) were observed.

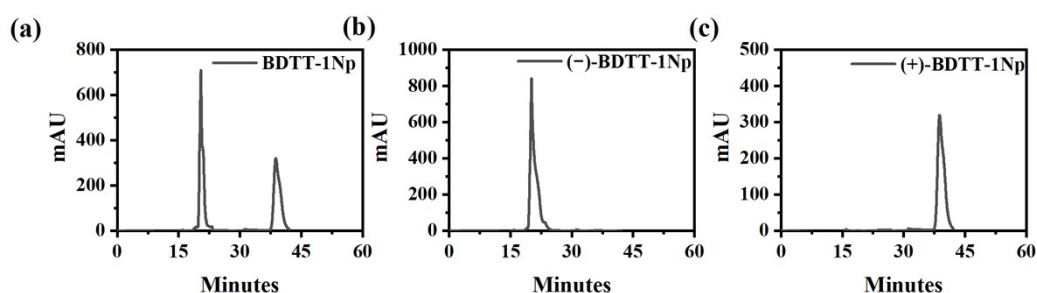

Figure S30. HPLC trace of **BDTT-1Np** (a), (–)-**BDTT-1Np** (b,  $ee > 99\%$ ) and (+)-**BDTT-1Np** (c,  $ee > 99\%$ ) at room temperature. Resolution of **BDTT-1Np** by chiral HPLC monitored at 254 nm was performed with a CHIRALPAK IB column. Eluent: hexane/dichloromethane (7/1, v/v), Flow Rate: 2.5 mL/min, Column: CHIRALPAK-IB.

### Racemization of (+)-**BDTT-1Np**

Racemization of (+)-**BDTT-1Np** was carried out in  $\text{CH}_2\text{Cl}_2$  by heating at different temperatures. The process was monitored from time to time by chiral HPLC (CHIRALPAK-IB)

with hexane /dichloromethane (7/1, v/v) as eluent. The half-life of (+)-**BDTT-1Np** was studied using the same method as for (+)-**BDTT-Me**:

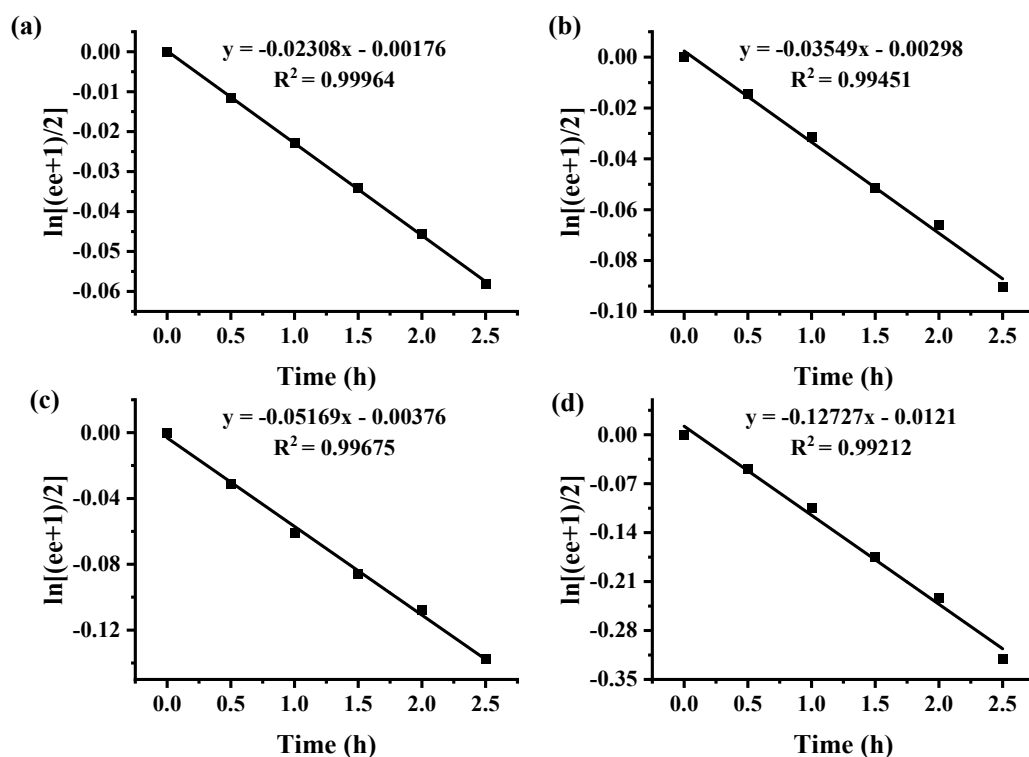

Figure S31. Time-dependent enantiomeric excess value decay profiles at (a) 60 °C, (b) 70 °C, (c) 80 °C and (d) 90 °C, respectively.

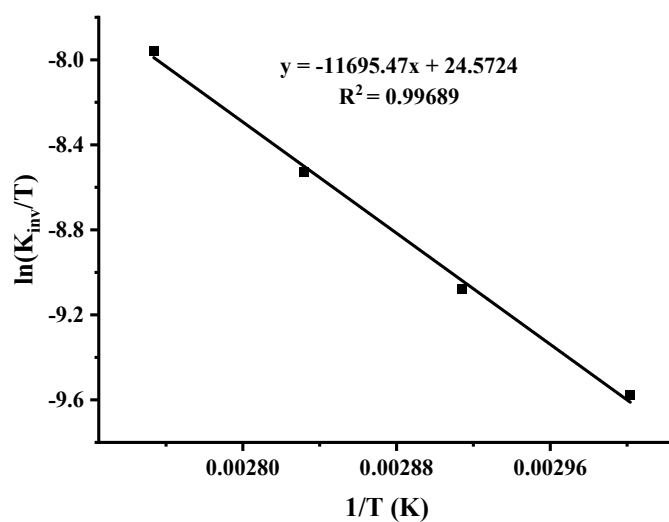

Figure S32. The half-life of (+)-**BDTT-1Np** at different temperatures.

Table S5. The half-life of (+)-**BDTT-1Np** at different temperatures.

| T/°C        | 60   | 70   | 80   | 90  |
|-------------|------|------|------|-----|
| $t_{1/2}/h$ | 30.0 | 20.0 | 13.4 | 5.5 |

Table S6. The inversion barriers of (+)-**BDTT-1Np** (R/S).

| Compound             | $\Delta H/\text{kcal/mol}$ | $\Delta S/\text{J/k}$ | $\Delta G/\text{kcal/mol}$ |
|----------------------|----------------------------|-----------------------|----------------------------|
| (+)- <b>BDTT-1Np</b> | 23.24                      | 6.77                  | 22.8                       |

### Resolution of **BDTT-2Np** and optical rotations

The resolution of the **BDTT-2Np** was carried out by chiral HPLC. The two enantiomers were obtained on a semipreparative scaled chiral column (CHIRALPAK-IB dimension: 10 mm $\phi$   $\times$  250 mmL); eluent: hexane/dichloromethane (6/1, v/v); Injection information: concentration, 1mg/mL and volume: 130  $\mu$ L/injection. From the 3.7 mg scale of **BDTT-2Np**, 1.0 mg (*ee* > 99%) of (+)-**BDTT-2Np** and 1.1 mg (*ee* > 99%) of (–)-**BDTT-2Np** were efficiently obtained. The optical rotations of (–)-**BDTT-2Np**,  $[\alpha]_D^{25} = -770^\circ$  (*c* = 0.32 mg/mL in DCM) and (+)-**BDTT-2Np**,  $[\alpha]_D^{25} = +743^\circ$  (*c* = 0.32 mg/mL in DCM) were observed.

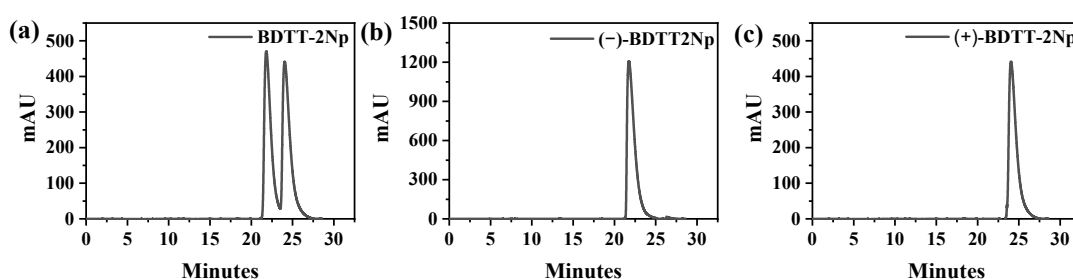

Figure S32. HPLC trace of **BDTT-2Np** (a), (–)-**BDTT-2Np** (b, *ee* > 99%) and (+)-**BDTT-2Np** (c, *ee* > 99%) at room temperature. Resolution of **BDTT-2Np** by chiral HPLC monitored at 254 nm was performed with a CHIRALPAK IB column. Eluent: hexane/dichloromethane (6/1, v/v), Flow Rate: 2.5 mL/min, Column: CHIRALPAK-IB.

### Racemization of (+)-BDTT-2Np

Racemization of (+)-BDTT-2Np was carried out in CH<sub>2</sub>Cl<sub>2</sub> by heating at different temperatures. The process was monitored from time to time by chiral HPLC (CHIRALPAK-IB) with hexane/dichloromethane (6/1, v/v) as eluent. The half-life of (+)-BDTT-2Np was studied using the same method as for (+)-BDTT-Me:

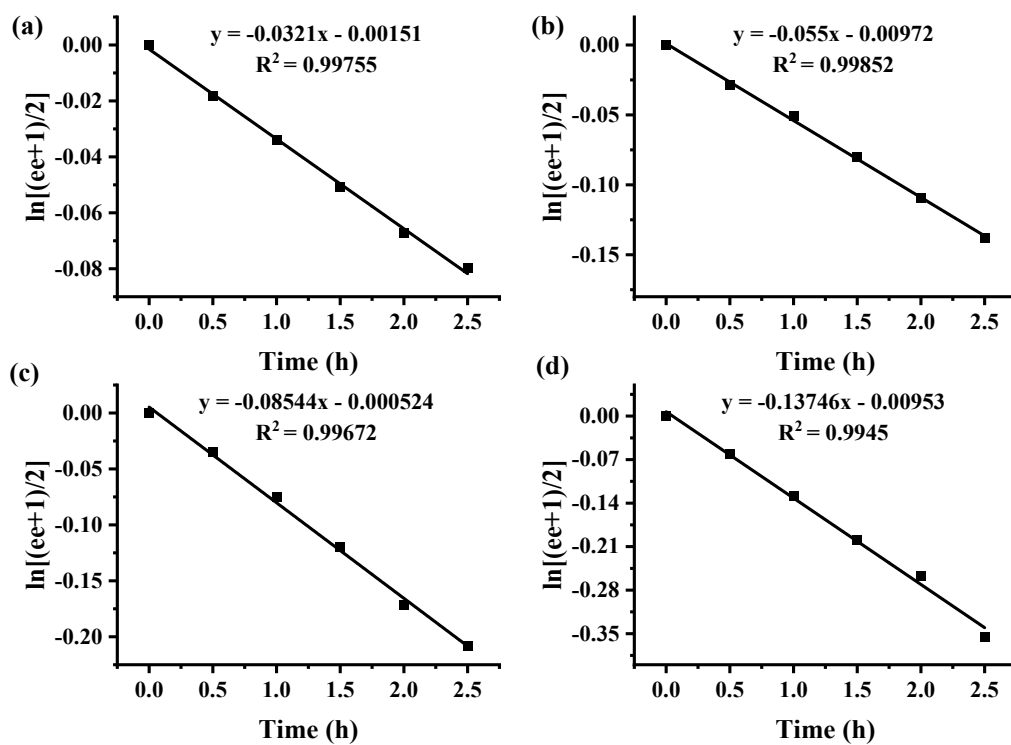

Figure S33. Time-dependent enantiomeric excess value decay profiles at (a) 60 °C, (b) 70 °C, (c) 80 °C, and (d) 90 °C, respectively.

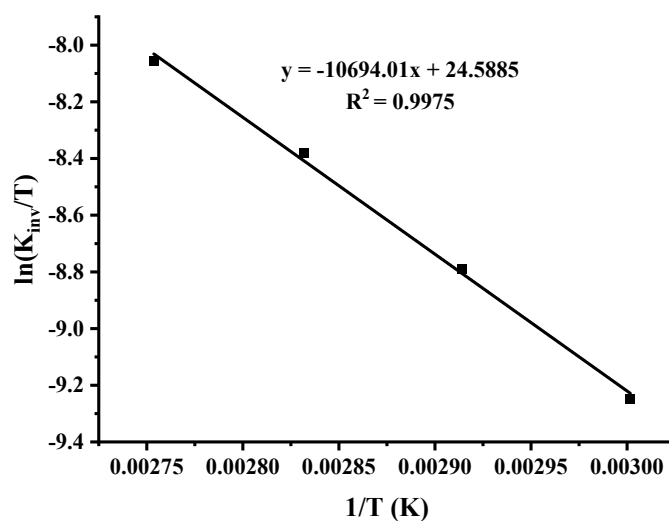

Figure S34. The half-life of (+)-**BDTT-2Np** at different temperatures.

Table S7. The half-life of (+)-**BDTT-2Np** at different temperatures.

| T/°C                | 60   | 70   | 80  | 90  |
|---------------------|------|------|-----|-----|
| t <sub>1/2</sub> /h | 21.6 | 12.6 | 8.1 | 5.0 |

Table S8. The inversion barriers of (–)-**BDTT-2Np** (R/S).

| Compound             | ΔH/kcal/mol | ΔS/J/k | ΔG/kcal/mol |
|----------------------|-------------|--------|-------------|
| (–)- <b>BDTT-2Np</b> | 21.26       | 6.9    | 20.9        |

### Resolution of **BDTT-2An** and optical rotations

The resolution of the **BDTT-2An** was carried out by chiral HPLC. The two enantiomers were obtained on a semipreparative scaled chiral column (CHIRALPAK-IB dimension: 10 mmϕ × 250 mm); eluent: hexane/dichloromethane (5/1, v/v); Injection information: concentration, 2 mg/mL and volume: 150 μL/injection. From the 4.2 mg scale of **BDTT-2An**, 0.9 mg (*ee* > 99%) of (–)-**BDTT-2An** and 1.1 mg (*ee* > 99%) of (+)-**BDTT-2An** were efficiently obtained. The optical rotations of (–)-**BDTT-2An**,  $[\alpha]_D^{25} = -1036^\circ$  (*c* = 0.350 mg/mL in DCM) and (+)-**BDTT-2An**,  $[\alpha]_D^{25} = +1002^\circ$  (*c* = 0.37 mg/mL in DCM) were observed.

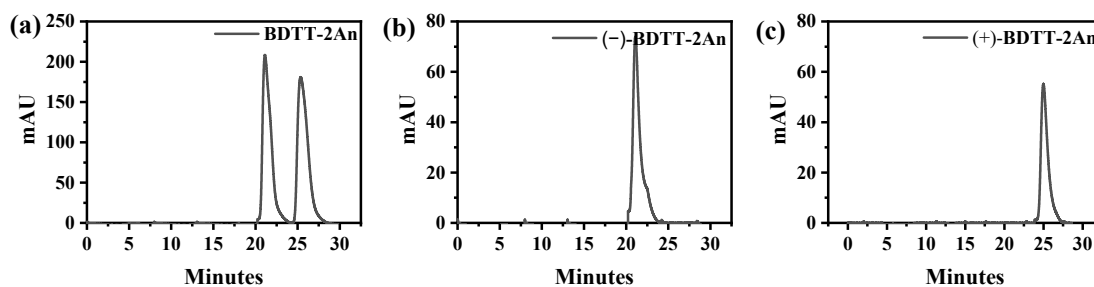

Figure S35. HPLC trace of **BDTT-2An** (a), **(-)-BDTT-2An** (b,  $ee > 99\%$ ) and **(+)-BDTT-2An** (c,  $ee > 99\%$ ) at room temperature. Resolution of **BDTT-2An** by chiral HPLC monitored at 254 nm was performed with a CHIRALPAK-IB column. Eluent: hexane/dichloromethane (5/1, v/v), Flow Rate: 2.5 mL/min, Column: CHIRALPAK-IB.

#### Racemization of (+)-BDTT-2An

Racemization of **(+)-BDTT-2An** was carried out in  $\text{CH}_2\text{Cl}_2$  by heating at different temperatures. The process was monitored from time to time by chiral HPLC (CHIRALPAK-IB) with hexane/dichloromethane (5/1, v/v) as eluent. The half-life of **(+)-BDTT-2An** was studied using the same method as for **(+)-BDTT-Me**:

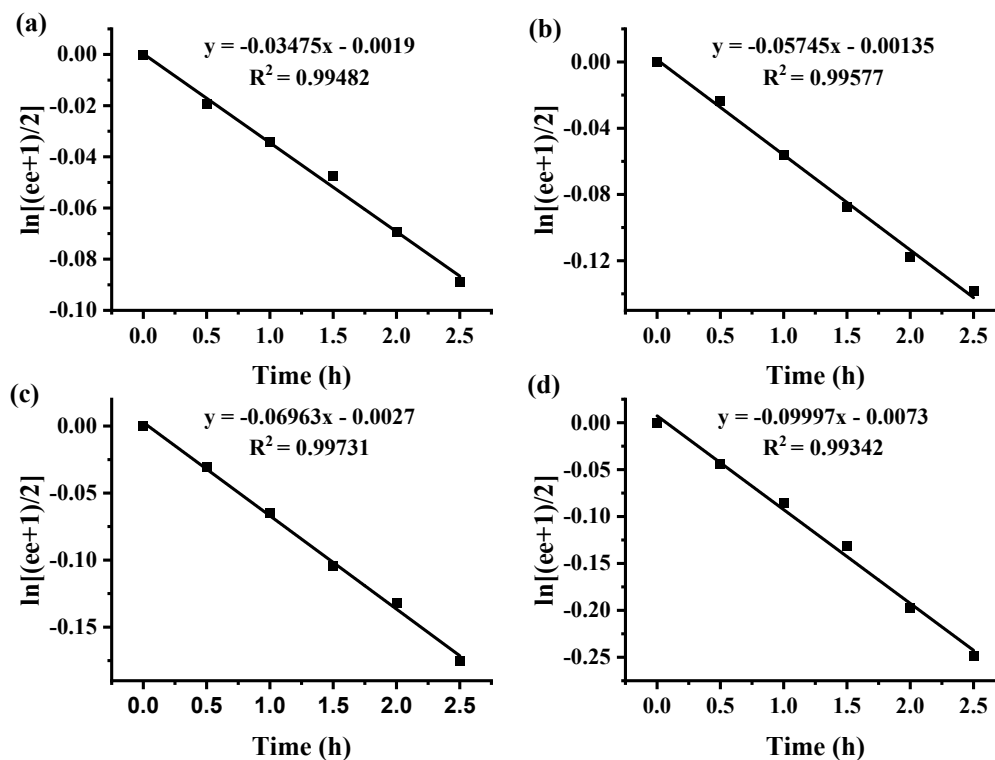

Figure S36. Time-dependent enantiomeric excess value decay profiles at (a) 100 °C, (b) 110 °C, (c) 120 °C, and (d) 130 °C, respectively.



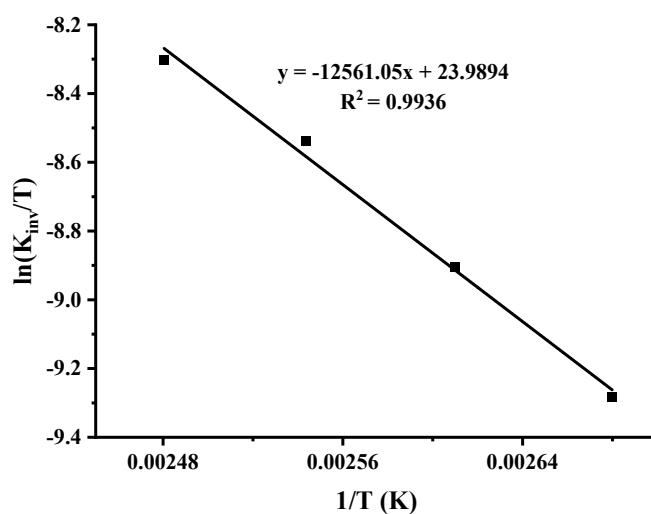

Figure S37. The half-life of (+)-**BDTT-2An** at different temperatures.

Table S9. The half-life of (+)-**BDTT-2An** at different temperatures.

| T/°C                | 100  | 110e | 120 | 130 |
|---------------------|------|------|-----|-----|
| t <sub>1/2</sub> /h | 20.0 | 12.2 | 9.9 | 7.0 |

Table S10. The inversion barriers of (+)-**BDTT-2An** (*R/S*).

| Compound             | $\Delta H$ /kcal/mol | $\Delta S$ /J/k | $\Delta G$ /kcal/mol |
|----------------------|----------------------|-----------------|----------------------|
| (+)- <b>BDTT-2An</b> | 24.96                | 1.92            | 24.83                |

### Resolution of **BDTT-9An** and optical rotations

The resolution of the **BDTT-9An** was carried out by chiral HPLC. The two enantiomers were obtained on a semipreparative scaled chiral column (CHIRALPAK-IB dimension: 10 mm $\phi$   $\times$  250 mmL); eluent: hexane/dichloromethane (95/5, v/v); Injection information: concentration, 2.5 mg/mL and volume: 100  $\mu$ L/injection. From the 6.2 mg scale of **BDTT-9An**, 1.0 mg (*ee* > 99%) of (–)-**BDTT-9An** and 1.3 mg (*ee* > 99%) of (+)-**BDTT-9An** were efficiently obtained. The optical rotations of (–)-**BDTT-9An**,  $[\alpha]_D^{25} = -1186^\circ$  (*c* = 0.35 mg/mL in DCM) and (+)-**BDTT-9An**,  $[\alpha]_D^{25} = +1108^\circ$  (*c* = 0.35 mg/mL in DCM) were observed.

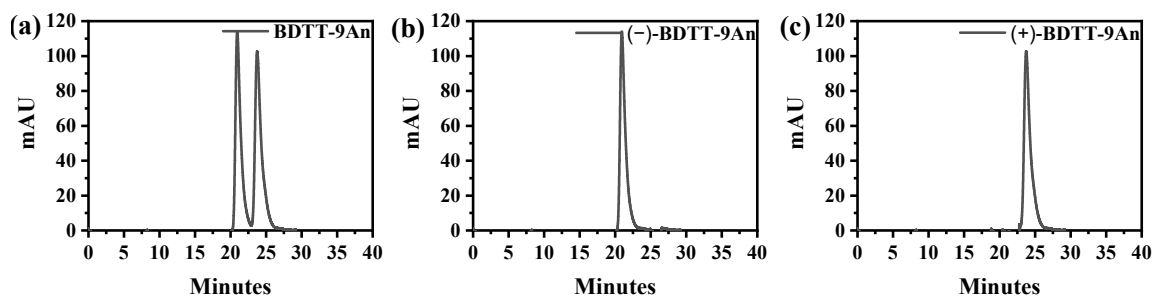

Figure S38. HPLC trace of **BDTT-9An** (a), **(-)-BDTT-9An** (b,  $ee > 99\%$ ) and **(+)-BDTT-9An** (c,  $ee > 99\%$ ) at room temperature. Resolution of **BDTT-9An** by chiral HPLC monitored at 254 nm was performed with a CHIRALPAK IB column. Eluent: hexane /dichloromethane (95/5,  $v/v$ ), Flow Rate: 2.5 mL/min, Column: CHIRALPAK-IB.

### Racemization of (+)-BDTT-9An

Racemization of **(+)-BDTT-9An** was carried out in  $\text{CH}_2\text{Cl}_2$  by heating at different temperatures. The process was monitored from time to time by chiral HPLC (CHIRALPAK-IB) with hexane/dichloromethane (95/5,  $v/v$ ) as eluent. The half-life of **(+)-BDTT-9An** was studied using the same method as for **(+)-BDTT-Me**:

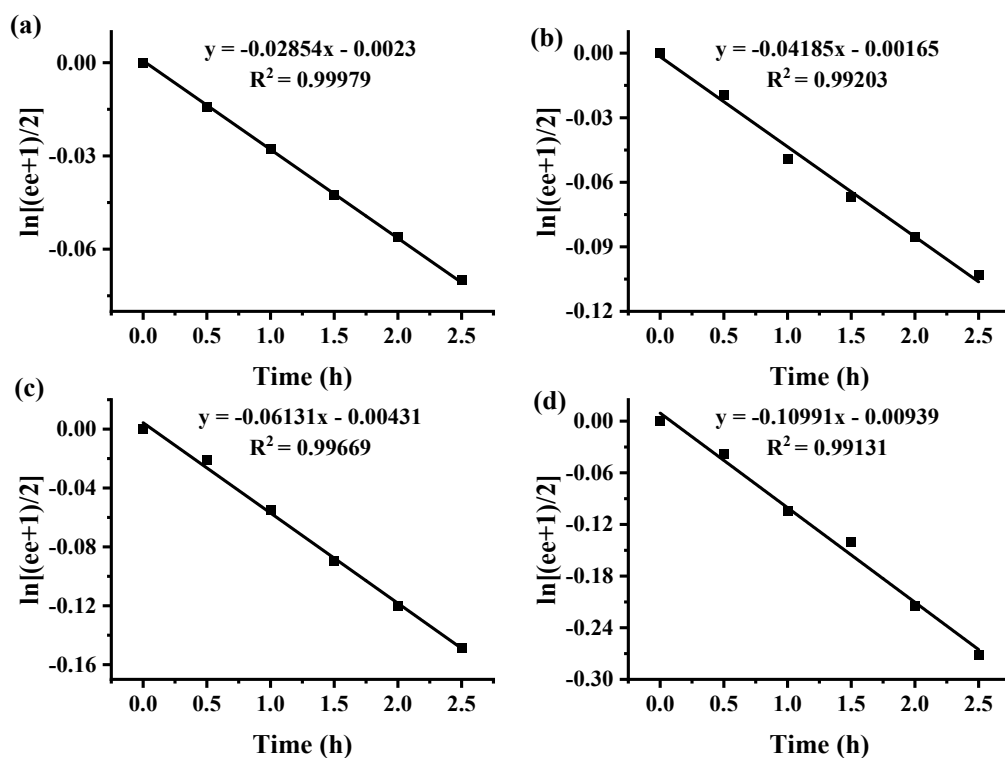

Figure S39. Time-dependent enantiomeric excess value decay profiles at (a) 120 °C, (b) 130 °C, (c) 140 °C, and (d) 150 °C, respectively.

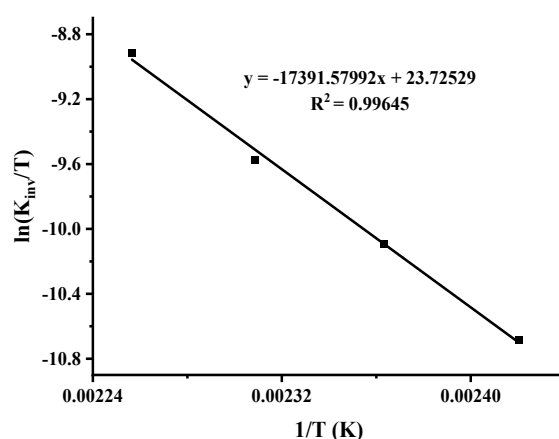

Figure S40. The half-life of (+)-**BDTT-9An** at different temperatures.

Table S11. The half-life of (+)-**BDTT-9An** at different temperatures.

| T/°C                | 120  | 130  | 140  | 150 |
|---------------------|------|------|------|-----|
| t <sub>1/2</sub> /h | 24.8 | 16.6 | 10.3 | 6.3 |

Table S12. The inversion barriers of (+)-**BDTT-9An** (R/S).

| Compound             | $\Delta H$ /kcal/mol | $\Delta S$ /J/k | $\Delta G$ /kcal/mol |
|----------------------|----------------------|-----------------|----------------------|
| (+)- <b>BDTT-9An</b> | 30.26                | 8.18            | 29.73                |

### Resolution of **BDTT-1Py** and optical rotations

The resolution of the **BDTT-1Py** was carried out by chiral HPLC. The two enantiomers were obtained on a semipreparative scaled chiral column (CHIRALPAK-IB dimension: 10 mm $\phi$   $\times$  250 mmL); eluent: hexane/dichloromethane (3/1, v/v); Injection information: concentration, 2.5 mg/mL and volume: 100  $\mu$ L/injection. From the 5.0 mg scale of **BDTT-1Py**, 1.2 mg (*ee* > 99%) of (–)-**BDTT-1Py** and 1.5 mg (*ee* > 99%) of (+)-**BDTT-1Py** were efficiently obtained. The optical rotations of (–)-**BDTT-1Py**,  $[\alpha]_D^{25} = -1205^\circ$  (*c* = 0.38 mg/mL in DCM) and (+)-**BDTT-1Py**,  $[\alpha]_D^{25} = +1242^\circ$  (*c* = 0.38 mg/mL in DCM) were observed.

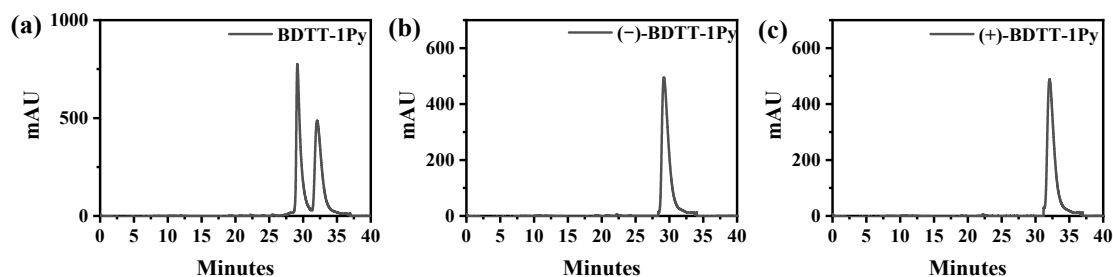

Figure S41. HPLC trace of **BDTT-1Py** (a), **(-)-BDTT-1Py** (b,  $ee > 99\%$ ) and **(+)-BDTT-1Py** (c,  $ee > 99\%$ ) at room temperature. Resolution of **BDTT-1Py** by chiral HPLC monitored at 254 nm was performed with a CHIRALPAK IB column. Eluent: hexane /dichloromethane (3/1, v/v), Flow Rate: 2.5 mL/min, Column: CHIRALPAK-IB.

### Racemization of (+)-BDTT-1Py

Racemization of **(+)-BDTT-1Py** was carried out in DCM by heating at different temperatures. The process was monitored from time to time by chiral HPLC (CHIRALPAK-IB) with hexane/dichloromethane (3/1, v/v) as eluent. The half-life of **(+)-BDTT-1Py** was studied using the same method as for **(+)-BDTT-Me**:

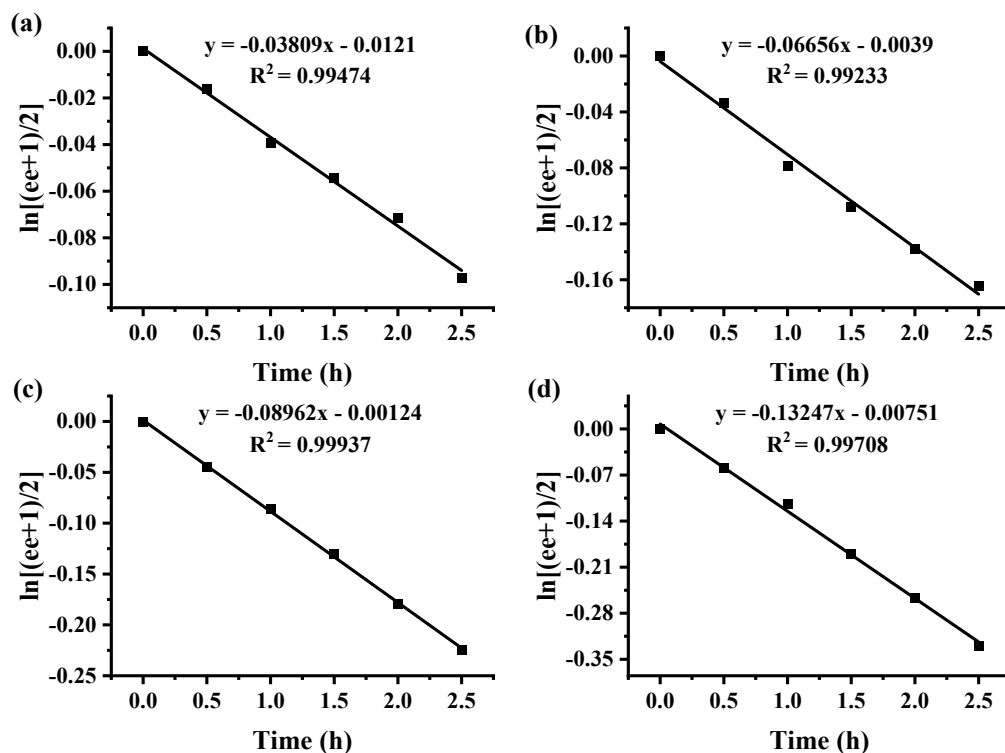

Figure S42. Time-dependent enantiomeric excess value decay profiles at (a) 100 °C, (b) 110 °C, (c) 120 °C, and (d) 130 °C, respectively.

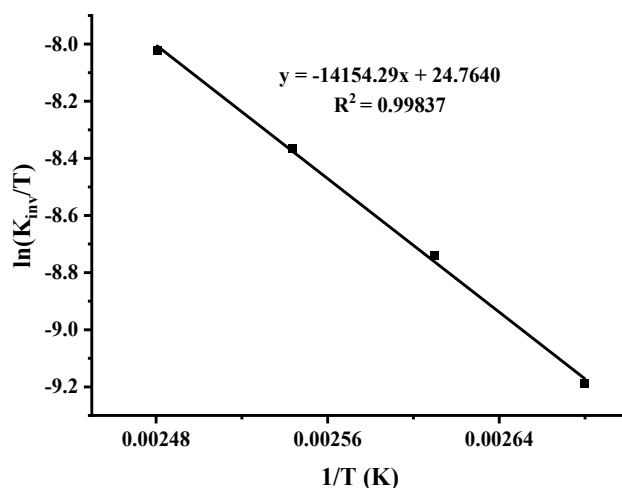

Figure S43. The half-life of (+)-**BDTT-1Py** at different temperatures.

Table S13. The half-life of (+)-**BDTT-1Py** at different temperatures.

| T/°C        | 100  | 110  | 120 | 130 |
|-------------|------|------|-----|-----|
| $t_{1/2}/h$ | 18.2 | 10.4 | 7.7 | 5.2 |

Table S14. The inversion barriers of (+)-**BDTT-1Py** (R/S).

| Compound             | $\Delta H/kcal/mol$ | $\Delta S/J/k$ | $\Delta G/kcal/mol$ |
|----------------------|---------------------|----------------|---------------------|
| (+)- <b>BDTT-1Py</b> | 28.13               | 8.36           | 27.58               |

#### 4. Optical and electrochemical data of **BDTT-Ars**.

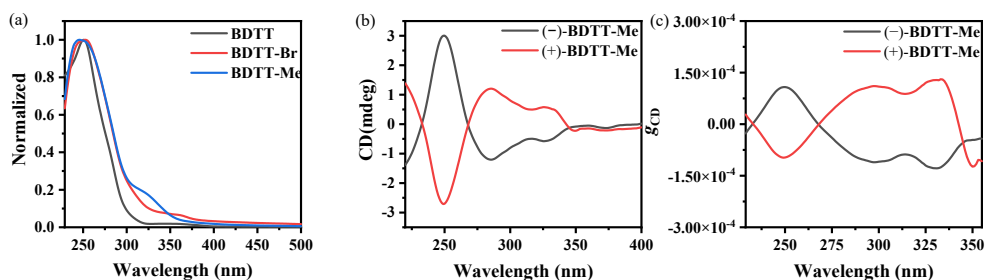

Figure S44. (a) Absorption spectra of **BDTT**, **BDTT-Br** and **BDTT-Me**; (b) CD spectra of **BDTT-Me** in DCM,  $[C] = 1.0 \times 10^{-4}$  M and (c) Absorption dissymmetry factor  $g_{abs}$  corresponded CD spectra of (-)-**BDTT-Me** and (+)-**BDTT-Me** at room temperature.

Table S15. Optical and electrochemical data of **BDTT-Ars**.

| Compound        | $\lambda_{\text{abs}}$<br>(nm) <sup>a</sup> | $\lambda_{\text{FL}}$<br>(nm) <sup>a</sup> | $\lambda_{\text{PL}}$<br>(nm) <sup>b</sup> | $\Phi_{\text{F}}$<br>/% <sup>c</sup> | $\tau_{\text{FL}}$<br>(ns) <sup>a</sup> | $\tau_{\text{PL}}$<br>(ms) <sup>b</sup> | $E_{\text{g}}^{\text{opt}}$<br>(eV) | HOMO<br>(eV) <sup>d</sup> | LUMO<br>(eV) <sup>d</sup> | $k_{\text{r}}$<br>(10 <sup>6</sup> S <sup>-1</sup> ) <sup>e</sup> | $k_{\text{nr}}$<br>(10 <sup>9</sup> S <sup>-1</sup> ) <sup>f</sup> |
|-----------------|---------------------------------------------|--------------------------------------------|--------------------------------------------|--------------------------------------|-----------------------------------------|-----------------------------------------|-------------------------------------|---------------------------|---------------------------|-------------------------------------------------------------------|--------------------------------------------------------------------|
| <b>BDTT-Me</b>  | 246, 317                                    | --                                         | --                                         | --                                   | --                                      | --                                      | 3.86                                | -5.74                     | -1.88                     | --                                                                | --                                                                 |
| <b>BDTT-Ph</b>  | 244, 314                                    | 400                                        | 504, 534                                   | 0.03/0.05 <sup>f</sup>               | 0.87                                    | 10                                      | 3.70                                | -5.70                     | -2.00                     | 0.34                                                              | 1.15                                                               |
| <b>BDTT-1Np</b> | 248, 319                                    | 403                                        | 506, 542                                   | 0.06/0.11 <sup>f</sup>               | 2.1                                     | 8                                       | 3.86                                | -5.68                     | -2.03                     | 0.29                                                              | 0.47                                                               |
| <b>BDTT-2Np</b> | 244, 328                                    | 408                                        | 512, 548                                   | 0.32/0.58 <sup>f</sup>               | 2.7                                     | 4                                       | 3.70                                | -5.62                     | -2.25                     | 1.20                                                              | 0.37                                                               |
| <b>BDTT-2An</b> | 259, 329                                    | 445                                        | 528, 552                                   | 0.47/2.94 <sup>f</sup>               | 6.3                                     | 110                                     | 3.65                                | -5.53                     | -2.46                     | 0.75                                                              | 0.16                                                               |
| <b>BDTT-9An</b> | 258, 380                                    | 358                                        | 544                                        | 0.19/2.72 <sup>f</sup>               | 1.7                                     | 26                                      | 3.37                                | -5.50                     | -2.40                     | 1.10                                                              | 0.59                                                               |
| <b>BDTT-1Py</b> | 242, 352                                    | 446                                        | 614, 672                                   | 0.59/3.16 <sup>f</sup>               | 7.2                                     | 75                                      | 3.07                                | -5.45                     | -2.39                     | 0.82                                                              | 0.14                                                               |

<sup>a</sup>In DCM solution at RT ( $1 \times 10^{-5}$  M); <sup>b</sup>In 2-MTHF solution at 77 K ( $1 \times 10^{-5}$  M); <sup>c</sup>Relative fluorescence quantum yield using quinine sulphate ( $\Phi_{\text{F}} = 0.55$ ,  $1 \times 10^{-5}$  M in 0.5 M H<sub>2</sub>SO<sub>4</sub>) as a standard; <sup>d</sup>CV measured in 0.1 M TBAF/ DCM at a scan rate of 100 mV/s, [C] =  $1 \times 10^{-3}$  M, vs Fc/Fc<sup>+</sup>.  $E_{\text{HOMO}} = -[E_{\text{ox}} - E_{(\text{Fc}/\text{Fc}^+)} + 4.8]$  eV.  $E_{\text{LUMO}} = E_{\text{g}} + E_{\text{HOMO}}$ . <sup>e</sup>Radiative decay rate constants calculated by  $\Phi_{\text{F}} = k_{\text{r}} \times \tau_{\text{F}}$ . <sup>f</sup>Nonradiative rate constants calculated by  $k_{\text{r}} + k_{\text{nr}} = \tau_{\text{F}}^{-1}$ . <sup>g</sup>The fluorescence quantum yields in solid states, Edinburgh FLS1000.

### Cyclic voltammetries of BDTT-Ars

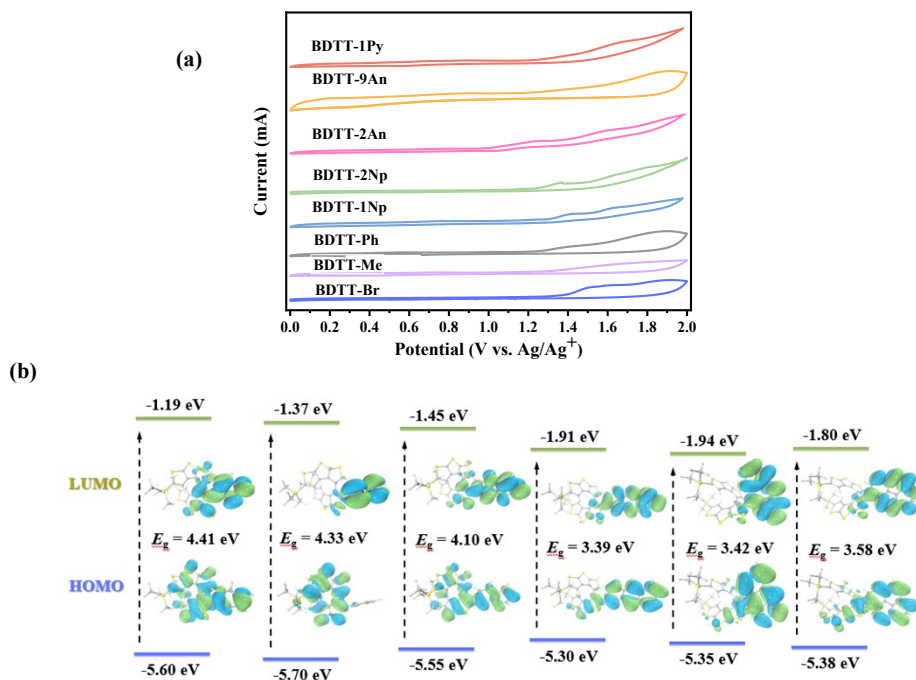

Figure S45. (a) Cyclic voltammogram (classical presentation) of **BDTT-Ars** in DCM ([C] =  $1 \times$

$10^{-3}$  M, supporting electrolyte:  $[n\text{Bu}_4\text{N}][\text{PF}_6]$  (0.1 M), scan rate:  $100 \text{ mV s}^{-1}$ , room temperature).

(b) Visualizations of HOMO and LUMO distributions (B3LYP/6-31G\*) for **BDTT-Ars**.

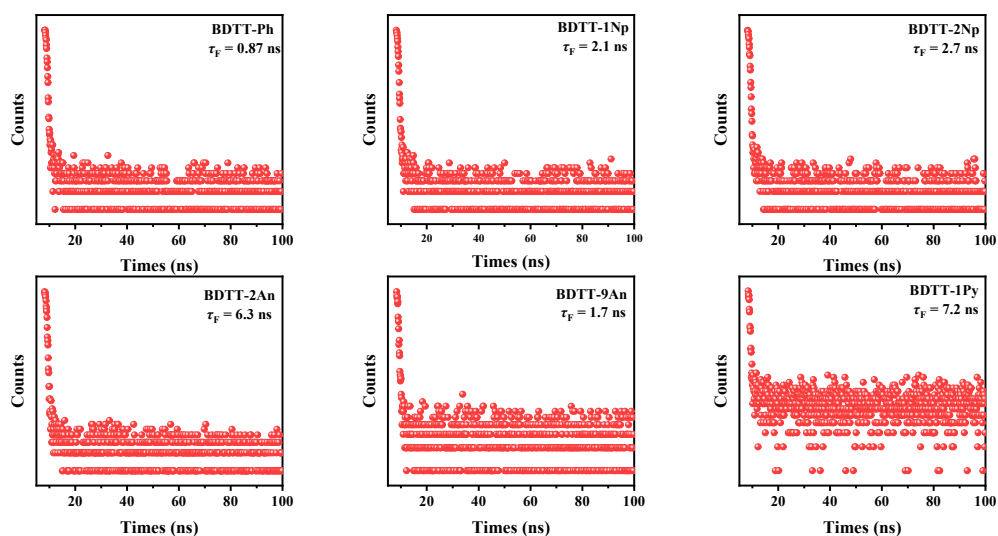

Figure S46. Time-resolved fluorescence decay of **BDTT-Ars** in DCM at room temperature.

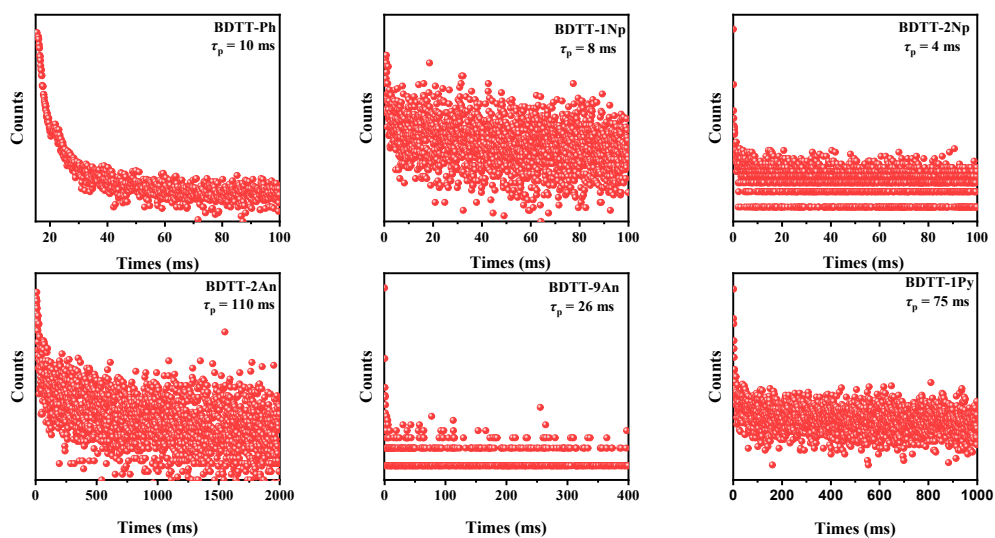

Figure S47. Phosphorescence transient decay spectra of **BDTT-Ars** in 2-MTHF at 77 K.

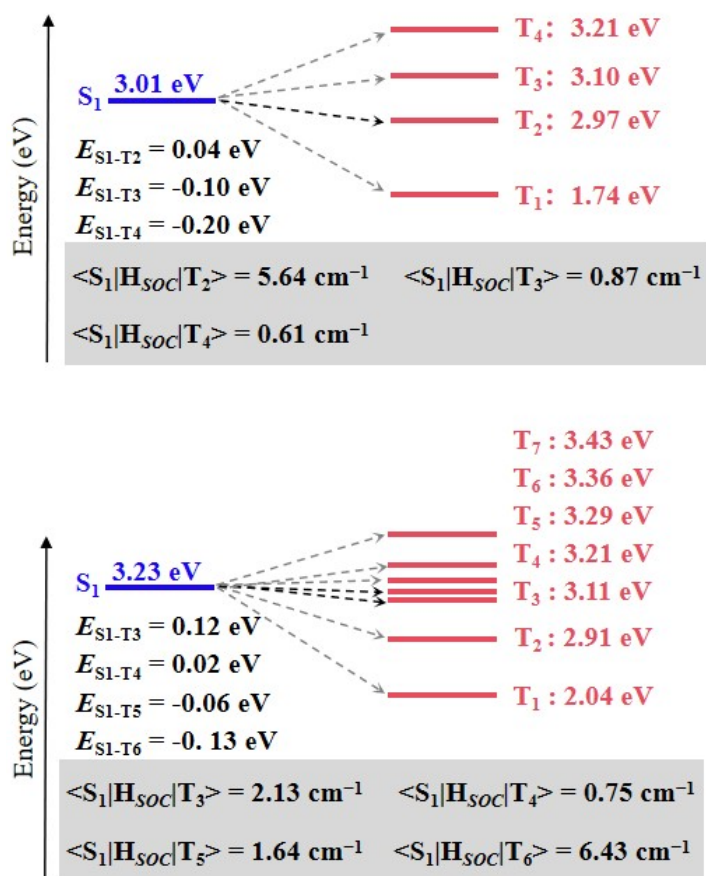

Figure S48. The fluorescence quantum Theoretical calculations of ISC channels, SOC matrix elements, and frontier molecular orbitals of **BDTT-9An** (up) and **BDTT-1Py** (down).

## 5. References

- S1. Suffert, J. Simple Direct Titration of Organolithium Reagents Using *N*-Pivaloyl-*o*-toluidine and/or *N*-pivaloyl-*o*-benzylaniline. *J. Org. Chem.* 1989, **54**, 509–510.
- S2. J. N. Demas, G. A. Crosby The Measurement of Photoluminescence Quantum Yields. *J. Phys. Chem.* 1971, **75**, 991–1024.
